# Supplementary material for: Pooled resequencing of larvae and adults reveals genomic variations associated with Ostreid herpesvirus 1 resistance in the Pacific oyster Crassostrea gigas
Source: Frontiers journal article supplement (doi:10.3389/fimmu.2022.928628), 2022-08-19
Supplement: Data_Sheet_1.zip [file Data_Sheet_1.zip]

## Sheet: Table S1
Table S1 Summary of pooled resequencing data.
Ls: larval susceptible population, Lr: larval resistant population, As: adult sensitive population, Ar: adult resistant population.
Samples	Genome size (M)	Effective size (M)	Raw Data					Mapped Data					depth	Coverage(M)	Coverage rate(%)
			Reads(M)	Base(M)	Q20 rate(%)	NP rate(%)	GC rate(%)	Reads(M)	%	Base(M)	%	PE%
Ls	559	493	500	46578	87.2	0.214059	34.05	314	62.57	29142	62.72	85.03	59.1	455	92.3
Lr	559	493	512	47418	86.2	0.155124	34.1	326	63.6	30156	63.75	85.07	61.16	455	92.34
Larval average	559	493	506	46998	86.7	0.184592	34.075	320	63.085	29649	63.235	85.05	60.13	455	92.32
As	559	493	362	34393	90.95	0.237049	34	231	63.75	21927	63.75	86.34	44.47	485	98.38
Ar	559	493	346	32837	93.05	0.255331	34.3	231	66.86	21954	66.86	86.53	44.53	485	98.26
Adult average	559	493	354	33615	92	0.24619	34.15	231	65.305	21940.5	65.305	86.435	44.5	485	98.32

## Sheet: Table S2
Table S2 Description of all SNPs in the larval and adult populations.
Ls: larval susceptible population, Lr: larval resistant population, As: adult sensitive population, Ar: adult resistant population.
Samples	Downstream	Exon	Intergenic	Intron	Upstream
Ls	653181	159262	1175361	1031951	626713
Lr	617628	150640	1118648	976551	591623
Larval average	635404	154951	1.147e+06	1004251	609168
As	707760	182200	1275019	1117272	680758
Ar	771789	197507	1407870	1227044	743070
Adult average	739774	189854	1.34144e+06	1172158	711914

## Sheet: Table S3
Table S3 Gene Ontology (GO) enrichment analysis of 1,831 genes identified by base frequency analysis, 1,401 genes identified by the FST distribution analysis, and 3,111 selective genes based on base frequency (more than 0.5) and top 5% highest values of FST analyses in oyster larval population
Gene Ontology (GO) enrichment analysis of 1,831 genes identified by base frequency analysis in oyster larval population
Class	GO Name	GO Level	p value	Enrichment Score
Biological process	adenylate cyclase-modulating G protein-coupled receptor signaling pathway	7	0.00113737	3.66914
Biological process	regulation of cell division	5	0.00267022	2.23123
Biological process	respiratory electron transport chain	6	0.00275301	3.22168
Biological process	carbohydrate derivative metabolic process	4	0.00372025	1.5395
Biological process	positive regulation of exocytosis	9	0.00387847	3.81026
Biological process	electron transport chain	5	0.00411038	2.80377
Biological process	ATP synthesis coupled electron transport	7	0.00473703	3.66914
Biological process	mitochondrial ATP synthesis coupled electron transport	8	0.00473703	3.66914
Biological process	purine nucleotide metabolic process	9	0.00489813	1.83457
Biological process	negative regulation of synaptic transmission	8	0.00512303	3.21049
Biological process	purine ribonucleotide metabolic process	10	0.00563501	1.91742
Biological process	mitochondrial fission	7	0.005775	4.12778
Biological process	regulation of lipase activity	6	0.005775	4.12778
Biological process	G protein-coupled receptor signaling pathway, coupled to cyclic nucleotide second messenger	7	0.00599737	3.12372
Biological process	ribonucleotide metabolic process	9	0.00643735	1.89299
Biological process	cAMP-mediated signaling	9	0.00697848	3.04152
Biological process	oocyte development	6	0.00885539	1.83457
Biological process	negative regulation of protein kinase B signaling	9	0.00887637	3.75253
Biological process	regulation of exocytosis	8	0.00929078	2.88944
Biological process	ribose phosphate metabolic process	6	0.0100067	1.8122
Biological process	cytokinesis	4	0.0102025	1.88698
Biological process	purine-containing compound metabolic process	5	0.010338	1.7165
Biological process	chromatin organization involved in regulation of transcription	6	0.0107757	2.1078
Biological process	positive regulation of lipid localization	6	0.0121314	2.54017
Biological process	oocyte axis specification	5	0.0121371	2.00602
Biological process	oocyte differentiation	5	0.0130157	1.73321
Biological process	positive regulation of leukocyte mediated immunity	7	0.0130438	3.00202
Biological process	second-messenger-mediated signaling	7	0.0140489	1.96922
Biological process	oocyte construction	6	0.0140489	1.96922
Biological process	protein targeting to membrane	12	0.0150535	2.91373
Biological process	heterochromatin assembly	8	0.0150535	2.91373
Biological process	regulation of lipid localization	5	0.0165965	2.06389
Biological process	chromatin organization involved in negative regulation of transcription	7	0.0165965	2.06389
Biological process	nucleoside triphosphate metabolic process	8	0.0171231	1.98133
Biological process	G protein-coupled receptor signaling pathway	6	0.0173085	1.74341
Biological process	cell division	3	0.0189549	1.49166
Biological process	heart process	5	0.0205917	2.18529
Biological process	blastocyst development	4	0.0218193	2.4591
Biological process	regulation of microtubule polymerization or depolymerization	9	0.0218193	2.4591
Biological process	positive regulation of intracellular transport	7	0.0222596	1.8059
Biological process	purine nucleoside monophosphate metabolic process	9	0.0224625	2.15362
Biological process	purine ribonucleoside monophosphate metabolic process	10	0.0224625	2.15362
Biological process	ATP metabolic process	3	0.0224838	1.97415
Biological process	carbohydrate derivative biosynthetic process	5	0.0232508	1.55002
Biological process	establishment of localization in cell	4	0.0238731	1.24516
Biological process	cyclic-nucleotide-mediated signaling	8	0.0242627	2.40787
Biological process	nucleotide metabolic process	8	0.0252957	1.53747
Biological process	ribonucleoside triphosphate metabolic process	9	0.0255013	2.01355
Biological process	purine ribonucleoside triphosphate metabolic process	10	0.0255013	2.01355
Biological process	ribonucleoside monophosphate metabolic process	9	0.0265639	2.09296
Biological process	synaptic vesicle cycle	7	0.0265639	2.09296
Biological process	chromatin silencing	12	0.0265639	2.09296
Biological process	regulation of leukocyte mediated immunity	6	0.0268876	2.35873
Biological process	polysaccharide metabolic process	5	0.0268876	2.35873
Biological process	heart contraction	6	0.0271416	2.20148
Biological process	phosphatidylinositol metabolic process	8	0.0271416	2.20148
Biological process	organic hydroxy compound transport	8	0.0274935	1.98929
Biological process	proteoglycan biosynthetic process	8	0.0282954	2.84674
Biological process	axis specification	4	0.028441	1.55486
Biological process	negative regulation of gene expression, epigenetic	8	0.0288014	2.06389
Biological process	purine nucleotide biosynthetic process	10	0.0288014	2.06389
Biological process	oxidative phosphorylation	7	0.0296996	2.31156
Biological process	regulation of cytokinesis	7	0.0296996	2.31156
Biological process	organophosphate metabolic process	5	0.0303903	1.4052
Biological process	response to organic cyclic compound	5	0.0304391	1.36669
Biological process	purine-containing compound biosynthetic process	6	0.0311679	2.03562
Biological process	exocytosis	7	0.0318335	1.87239
Biological process	phosphatidylinositol biosynthetic process	9	0.0323247	2.75185
Biological process	short-term memory	8	0.0323247	2.75185
Biological process	nucleoside phosphate metabolic process	7	0.0335567	1.4951
Biological process	muscle contraction	5	0.0339927	1.85329
Biological process	regulation of gene silencing	7	0.0351479	2.09665
Biological process	positive regulation of lipid transport	9	0.0353275	2.41626
Biological process	generation of precursor metabolites and energy	4	0.0355285	1.60394
Biological process	cytoplasmic microtubule organization	8	0.0366945	2.66308
Biological process	organophosphate catabolic process	6	0.0381375	2.06389
Biological process	nucleoside monophosphate metabolic process	8	0.039137	1.87626
Biological process	positive regulation of endocytosis	8	0.039137	1.87626
Biological process	nucleotide catabolic process	9	0.0391955	2.35873
Biological process	dendritic spine development	4	0.0414102	2.57986
Biological process	response to catecholamine	7	0.0414102	2.57986
Biological process	purine nucleoside triphosphate metabolic process	9	0.0418195	1.85518
Biological process	glycerophospholipid metabolic process	7	0.0418195	1.85518
Biological process	microtubule polymerization or depolymerization	8	0.0419842	1.92987
Biological process	regulated exocytosis	8	0.0429084	2.14033
Biological process	protein import into nucleus	11	0.0430854	1.69011
Biological process	cellular polysaccharide metabolic process	6	0.0433226	2.30388
Biological process	energy derivation by oxidation of organic compounds	5	0.0448192	1.7229
Biological process	chemosensory behavior	3	0.0450394	1.90513
Biological process	cellular response to organic cyclic compound	6	0.0455187	1.43575
Biological process	anterograde trans-synaptic signaling	7	0.0456085	1.41213
Biological process	chemical synaptic transmission	8	0.0456085	1.41213
Biological process	response to monoamine	6	0.0464756	2.50168
Biological process	neuron projection organization	7	0.0464756	2.50168
Biological process	regulation of lipid transport	8	0.0467202	2.10141
Biological process	drug metabolic process	4	0.046759	1.50823
Biological process	cell maturation	5	0.046759	1.50823
Biological process	trans-synaptic signaling	6	0.0471511	1.4075
Biological process	organophosphate biosynthetic process	6	0.0472737	1.57249
Biological process	alcohol metabolic process	5	0.0475557	1.81441
Biological process	negative regulation of synapse organization	7	0.0477123	2.25152
Biological process	glycerophospholipid biosynthetic process	8	0.0477123	2.25152
Biological process	muscle system process	4	0.0478821	1.66391
Biological process	mitotic cytokinesis	6	0.0482397	1.88101
Biological process	cellular response to lipid	6	0.049791	1.51633
Cellular component	Z disc	3	0.00917805	2.66458
Cellular component	I band	3	0.0143123	2.47079
Cellular component	RNA polymerase II, holoenzyme	9	0.0230815	2.04659
Cellular component	cytoplasmic region	4	0.024271	1.52689
Cellular component	cell cortex	4	0.0250408	1.64387
Cellular component	transcription regulator complex	3	0.0253858	1.66921
Cellular component	intracellular protein-containing complex	3	0.032299	1.35324
Cellular component	cell periphery	3	0.0350968	1.18365
Cellular component	neuron projection terminus	3	0.0378544	1.88741
Cellular component	neuromuscular junction	5	0.0417859	2.02826
Cellular component	obsolete cell cortex part	0	0.0430598	1.84638
Cellular component	RNA polymerase complex	6	0.043877	1.77956
Cellular component	DNA-directed RNA polymerase complex	7	0.043877	1.77956
Cellular component	nuclear DNA-directed RNA polymerase complex	8	0.043877	1.77956
Cellular component	axon terminus	4	0.0443718	1.911
Molecular function	signaling receptor activity	3	0.00420469	1.79418
Molecular function	molecular transducer activity	2	0.00496543	1.77026
Molecular function	protein-containing complex binding	3	0.00948989	1.50589
Molecular function	peptide binding	4	0.00950324	2.47396
Molecular function	amide binding	3	0.00997924	2.21506
Molecular function	damaged DNA binding	6	0.01754	3.20699
Molecular function	kinase inhibitor activity	5	0.0203734	3.09245
Molecular function	oxidoreductase activity, acting on NAD(P)H	4	0.0234904	2.98581
Molecular function	transmembrane signaling receptor activity	4	0.0337353	1.70738
Molecular function	ligase activity, forming carbon-oxygen bonds	4	0.0346239	2.70589
Molecular function	aminoacyl-tRNA ligase activity	5	0.0346239	2.70589
Molecular function	protein methyltransferase activity	6	0.0390671	2.36151
Molecular function	hormone binding	3	0.0435928	2.54672
Molecular function	small GTPase binding	6	0.0460704	1.60349
Molecular function	N-methyltransferase activity	6	0.0471342	2.25883
Gene Ontology (GO) enrichment analysis of 1,401 genes identified by the FST distribution analysis in oyster larvae
Class	GO Name	GO Level	p value	Enrichment Score
Molecular function	carbohydrate binding	3	0.00763755	3.40733
Molecular function	catalytic activity	2	0.00828276	1.20382
Molecular function	modification-dependent protein binding	4	0.0275916	2.58297
Molecular function	oxidoreductase activity	3	0.0344945	1.63621
Molecular function	transferase activity	3	0.0424283	1.2723
Molecular function	transition metal ion binding	6	0.0469921	1.71277
Cellular component	ubiquitin ligase complex	5	0.00224703	2.4672
Cellular component	intracellular protein-containing complex	3	0.0295911	1.46894
Biological process	protein O-linked glycosylation	9	0.0019675	4.44319
Biological process	metabolic process	2	0.00772064	1.10703
Biological process	small molecule metabolic process	3	0.00775375	1.4597
Biological process	glycosylation	3	0.00909569	2.37785
Biological process	regulation of cell cycle G2/M phase transition	8	0.00942072	2.92629
Biological process	negative regulation of protein-containing complex assembly	7	0.00942072	2.92629
Biological process	cell cycle G2/M phase transition	5	0.0107624	2.62467
Biological process	response to organic cyclic compound	5	0.0128894	1.56555
Biological process	macromolecule glycosylation	6	0.0129667	2.38028
Biological process	protein glycosylation	8	0.0129667	2.38028
Biological process	cellular modified amino acid metabolic process	5	0.015288	2.66809
Biological process	regulation of G2/M transition of mitotic cell cycle	9	0.0170366	2.87984
Biological process	cellular response to amino acid starvation	8	0.0179456	3.23983
Biological process	negative regulation of cell cycle G2/M phase transition	9	0.0179456	3.23983
Biological process	regulation of DNA replication	8	0.0200998	2.77699
Biological process	G2/M transition of mitotic cell cycle	6	0.0204146	2.51986
Biological process	response to amino acid starvation	7	0.0218056	3.08555
Biological process	response to starvation	6	0.0252345	1.83121
Biological process	cellular metabolic process	3	0.0264162	1.09506
Biological process	glycoprotein biosynthetic process	7	0.028217	1.99374
Biological process	vesicle fusion	8	0.0285448	2.87984
Biological process	response to nutrient levels	5	0.0290095	1.61991
Biological process	cellular lipid catabolic process	6	0.0301817	2.32603
Biological process	biological process involved in interaction with symbiont	4	0.0310535	2.81724
Biological process	regulation of receptor signaling pathway via STAT	7	0.0310535	2.81724
Biological process	regulation of receptor signaling pathway via JAK-STAT	8	0.0310535	2.81724
Biological process	cellular response to xenobiotic stimulus	5	0.0310535	2.81724
Biological process	cytoskeleton-dependent cytokinesis	5	0.0330631	2.02841
Biological process	cellular response to organic cyclic compound	6	0.037514	1.59644
Biological process	response to extracellular stimulus	4	0.0376935	1.57082
Biological process	cellular response to lipid	6	0.0393163	1.71909
Biological process	carbohydrate metabolic process	4	0.041999	1.74732
Biological process	modulation of process of other organism	3	0.0424448	2.59186
Biological process	organonitrogen compound biosynthetic process	5	0.0429536	1.33996
Biological process	response to lipid	5	0.0453663	1.51524
GO enrichment analysis of 3,111 selective genes based on base frequency (more than 0.5) and top 5% highest values of FST analyses in oyster larval population
Class	GO Name	GO Level	p value	Enrichment Score
Molecular function	signal sequence binding	5	0.00447277	4.17513
Molecular function	transferase activity, transferring sulfur-containing groups	4	0.00751368	2.92259
Molecular function	amide binding	3	0.0110227	1.89337
Molecular function	peptide binding	4	0.0111332	2.06768
Molecular function	NAD binding	6	0.0202488	3.01537
Molecular function	transferase activity, transferring hexosyl groups	5	0.032572	1.74222
Molecular function	oxidoreductase activity	3	0.0357864	1.37251
Molecular function	methylated histone binding	6	0.0387707	2.32615
Molecular function	methylation-dependent protein binding	5	0.0387707	2.32615
Molecular function	protein methyltransferase activity	6	0.0449576	1.9737
Molecular function	protein-containing complex binding	3	0.045695	1.2771
Molecular function	syntaxin binding	5	0.0458963	2.46712
Cellular component	intracellular protein-containing complex	3	0.00651172	1.36358
Cellular component	Z disc	3	0.0066068	2.29981
Cellular component	I band	3	0.011785	2.13255
Cellular component	nucleoplasm	3	0.0285016	1.14806
Cellular component	phagocytic vesicle	9	0.0437686	1.98377
Cellular component	lamellipodium	5	0.0492929	1.93869
Biological process	cytokinesis	4	0.00362563	1.77728
Biological process	nitric-oxide synthase biosynthetic process	6	0.00384294	3.6591
Biological process	regulation of nitric-oxide synthase biosynthetic process	7	0.00384294	3.6591
Biological process	protein targeting to membrane	12	0.00393612	2.74432
Biological process	carbohydrate derivative metabolic process	4	0.00443295	1.40166
Biological process	response to organic cyclic compound	5	0.00449562	1.3916
Biological process	protein O-linked glycosylation	9	0.0048558	2.66591
Biological process	adenylate cyclase-modulating G protein-coupled receptor signaling pathway	7	0.00593398	2.59186
Biological process	oocyte axis specification	5	0.00620494	1.84095
Biological process	response to nutrient levels	5	0.00663036	1.47592
Biological process	response to extracellular stimulus	4	0.00678824	1.4661
Biological process	oocyte construction	6	0.00759752	1.80717
Biological process	mitotic cytokinesis	6	0.00768051	1.9685
Biological process	regulation of cell division	5	0.00923322	1.77461
Biological process	regulation of lipase activity	6	0.009369	3.11023
Biological process	obsolete interaction with symbiont via secreted substance	0	0.010865	3.45581
Biological process	carbohydrate derivative biosynthetic process	5	0.0110379	1.48106
Biological process	positive regulation of leukocyte mediated immunity	7	0.0112814	2.51332
Biological process	carbohydrate metabolic process	4	0.0114068	1.57259
Biological process	oocyte development	6	0.0118421	1.59991
Biological process	ATP synthesis coupled electron transport	7	0.0119924	2.68786
Biological process	mitochondrial ATP synthesis coupled electron transport	8	0.0119924	2.68786
Biological process	glycoprotein biosynthetic process	7	0.0123067	1.67474
Biological process	small molecule metabolic process	3	0.0123956	1.25321
Biological process	regulated exocytosis	8	0.0125636	2.11189
Biological process	cytoskeleton-dependent cytokinesis	5	0.01335	1.71288
Biological process	respiratory electron transport chain	6	0.0143075	2.27578
Biological process	obsolete symbiotic process mediated by secreted substance	0	0.0145745	3.23983
Biological process	cellular response to organic cyclic compound	6	0.0147624	1.4274
Biological process	synaptic vesicle cycle	7	0.0169102	1.89826
Biological process	sterol metabolic process	6	0.0190238	2.30388
Biological process	regulation of cytokinesis	7	0.0191685	2.07349
Biological process	organonitrogen compound biosynthetic process	5	0.0205279	1.24042
Biological process	cholesterol metabolic process	7	0.0213518	2.41907
Biological process	cellular response to lipid	6	0.0215494	1.48106
Biological process	G protein-coupled receptor signaling pathway, coupled to cyclic nucleotide second messenger	7	0.022289	2.24161
Biological process	exocytosis	7	0.0223602	1.71009
Biological process	oocyte differentiation	5	0.0245546	1.48925
Biological process	cAMP-mediated signaling	9	0.0259302	2.18262
Biological process	signal release from synapse	8	0.0277739	1.82955
Biological process	neurotransmitter secretion	9	0.0277739	1.82955
Biological process	electron transport chain	5	0.0280392	1.95612
Biological process	synaptic vesicle exocytosis	9	0.0283102	2.48819
Biological process	response to lipid	5	0.0287905	1.33979
Biological process	nucleoside triphosphate metabolic process	8	0.0289933	1.65879
Biological process	cellular response to oxygen-containing compound	5	0.0293056	1.28699
Biological process	response to starvation	6	0.0295265	1.46496
Biological process	response to catecholamine	7	0.0298528	2.26788
Biological process	positive regulation of B cell mediated immunity	9	0.0304765	2.72827
Biological process	regulation of regulated secretory pathway	9	0.0304765	2.72827
Biological process	positive regulation of immunoglobulin mediated immune response	10	0.0304765	2.72827
Biological process	regulation of protein autophosphorylation	10	0.0304765	2.72827
Biological process	second-messenger-mediated signaling	7	0.031123	1.61694
Biological process	blastocyst development	4	0.0331964	1.98525
Biological process	positive regulation of exocytosis	9	0.0339031	2.39249
Biological process	regulation of exocytosis	8	0.0344135	2.07349
Biological process	secondary alcohol metabolic process	6	0.0344135	2.07349
Biological process	chromatin organization involved in regulation of transcription	6	0.0345128	1.65438
Biological process	larval midgut histolysis	4	0.0348528	2.19915
Biological process	response to monoamine	6	0.0348528	2.19915
Biological process	response to organonitrogen compound	5	0.03731	1.26212
Biological process	mitochondrial fission	7	0.0375124	2.59186
Biological process	myeloid cell activation involved in immune response	6	0.0375124	2.59186
Biological process	chromatin silencing	12	0.0375226	1.75224
Biological process	glycoprotein metabolic process	6	0.0385859	1.48106
Biological process	purine nucleotide metabolic process	9	0.0394763	1.42621
Biological process	calcium-ion regulated exocytosis	9	0.0403779	2.13447
Biological process	heterochromatin assembly	8	0.0403779	2.13447
Biological process	monoamine transport	8	0.0403779	2.13447
Biological process	purine ribonucleotide metabolic process	10	0.041063	1.47151
Biological process	chromatin organization involved in negative regulation of transcription	7	0.0411379	1.64937
Biological process	negative regulation of gene expression, epigenetic	8	0.0412507	1.72791
Biological process	ribose phosphate metabolic process	6	0.0420143	1.45397
Biological process	regulation of leukocyte mediated immunity	6	0.0421783	1.90422
Biological process	drug metabolic process	4	0.0426581	1.39562
Biological process	positive regulation of B cell activation	9	0.0454629	2.46844
Biological process	glycosaminoglycan biosynthetic process	7	0.0454629	2.46844
Biological process	regulation of chromatin silencing	11	0.0454629	2.46844
Biological process	ribonucleotide metabolic process	9	0.0463645	1.45276
Biological process	carbohydrate derivative transport	8	0.0471091	2.22159
Biological process	oxidative phosphorylation	7	0.0472293	1.86614
Biological process	catabolic process	3	0.0473632	1.15194
Biological process	macromolecule glycosylation	6	0.047535	1.58685
Biological process	protein glycosylation	8	0.047535	1.58685
Biological process	ribonucleoside triphosphate metabolic process	9	0.0491108	1.64362
Biological process	purine ribonucleoside triphosphate metabolic process	10	0.0491108	1.64362
Biological process	leukocyte activation involved in immune response	5	0.0491108	1.64362
Biological process	cellular carbohydrate metabolic process	5	0.0499764	1.55027

## Sheet: Table S4
Table S4 GO enrichment analysis of 4,863 selective genes based on base frequency (more than 50%) and top 5% highest values of FST analyses in adult population
Class	GO Name	GO Level	p value	Enrichment Score
Molecular function	cysteine-type endopeptidase activity	6	0.00422278	2.45554
Molecular function	mannosyltransferase activity	6	0.00472266	3.31498
Molecular function	ionotropic glutamate receptor binding	6	0.00472266	3.31498
Molecular function	mRNA methyltransferase activity	7	0.00572251	3.68331
Molecular function	tRNA binding	6	0.00811581	2.38679
Molecular function	RNA methyltransferase activity	6	0.00883102	2.14499
Molecular function	protein C-terminus binding	4	0.0105135	1.60726
Molecular function	MAP kinase kinase kinase activity	8	0.0161499	3.01362
Molecular function	translation regulator activity, nucleic acid binding	5	0.0202361	2.20999
Molecular function	translation regulator activity	2	0.0210485	1.9192
Molecular function	glutamate receptor binding	5	0.0223313	2.32049
Molecular function	cyclin binding	4	0.0223313	2.32049
Molecular function	transferase activity, transferring one-carbon groups	4	0.0223586	1.52489
Molecular function	translation initiation factor activity	7	0.0243122	2.76248
Molecular function	protein kinase C binding	7	0.0292601	2.20999
Molecular function	methyltransferase activity	5	0.0340413	1.49709
Molecular function	signal sequence binding	5	0.0347165	2.54999
Molecular function	SH3 domain binding	5	0.0426157	2.20999
Molecular function	S-adenosylmethionine-dependent methyltransferase activity	6	0.0437596	1.51062
Molecular function	RNA binding	5	0.0467139	1.22554
Molecular function	DNA polymerase activity	6	0.0471389	2.01781
Molecular function	tRNA methyltransferase activity	7	0.0474871	2.36784
Molecular function	carbon-oxygen lyase activity	4	0.0497827	1.69604
Cellular component	nucleoplasm	3	0.00554588	1.14942
Cellular component	septate junction	7	0.00843169	2.73099
Cellular component	endoplasmic reticulum exit site	3	0.0171015	2.65296
Cellular component	cleavage furrow	5	0.0254807	1.87068
Cellular component	nuclear lumen	5	0.0306318	1.09174
Cellular component	spindle pole	3	0.0320247	1.58804
Cellular component	Golgi transport complex	4	0.0347028	2.55092
Cellular component	P-body	8	0.0362284	1.77942
Cellular component	cell division site	3	0.0362284	1.77942
Cellular component	obsolete cell division site part	0	0.0362284	1.77942
Cellular component	intracellular organelle lumen	4	0.0369222	1.08133
Cellular component	organelle lumen	4	0.0378618	1.08079
Cellular component	membrane-enclosed lumen	3	0.0388207	1.08024
Biological process	male meiosis cytokinesis	7	8.06541e-05	2.92346
Biological process	meiosis II cell cycle process	5	0.000315105	2.87706
Biological process	meiosis II cytokinesis	7	0.00038314	4.11942
Biological process	meiotic cytokinesis	6	0.000943548	2.25161
Biological process	meiosis I cytokinesis	7	0.0012727	3.23669
Biological process	male meiotic nuclear division	9	0.00160254	1.89886
Biological process	positive regulation of protein localization to plasma membrane	9	0.00182728	2.69724
Biological process	septate junction assembly	9	0.00182728	2.69724
Biological process	cell division	3	0.00197416	1.39147
Biological process	regulation of phospholipase activity	7	0.00259927	3.23669
Biological process	pentose metabolic process	6	0.00324342	4.04586
Biological process	intraciliary anterograde transport	13	0.00324342	4.04586
Biological process	positive regulation of protein localization to cell periphery	8	0.0036912	2.48976
Biological process	melanotic encapsulation of foreign target	9	0.00509097	2.53306
Biological process	negative regulation of lipid localization	6	0.00509097	2.53306
Biological process	tetrapyrrole biosynthetic process	6	0.00535177	3.23669
Biological process	RNA methylation	9	0.00543337	2.10385
Biological process	porphyrin-containing compound metabolic process	6	0.00637389	3.59632
Biological process	porphyrin-containing compound biosynthetic process	7	0.00637389	3.59632
Biological process	negative regulation of Toll signaling pathway	8	0.00637389	3.59632
Biological process	mRNA modification	9	0.00653063	2.8321
Biological process	response to ischemia	4	0.00653063	2.8321
Biological process	exosomal secretion	8	0.00653063	2.8321
Biological process	extracellular vesicle biogenesis	5	0.00653063	2.8321
Biological process	spermatocyte division	4	0.00653063	2.8321
Biological process	mannosylation	4	0.00653063	2.8321
Biological process	extracellular exosome biogenesis	6	0.00653063	2.8321
Biological process	melanization defense response	8	0.00680962	2.31192
Biological process	encapsulation of foreign target	4	0.00680962	2.31192
Biological process	regulation of lipase activity	6	0.0070151	2.58935
Biological process	unidimensional cell growth	5	0.00704918	2.42752
Biological process	regulation of protein localization to plasma membrane	8	0.00758249	2.09947
Biological process	cell growth	3	0.00838692	1.33275
Biological process	positive regulation of protein localization to membrane	8	0.00856015	2.00366
Biological process	dorsal closure, elongation of leading edge cells	9	0.00865508	2.98771
Biological process	positive regulation of catalytic activity	5	0.00920202	1.26813
Biological process	response to UV-C	7	0.00953508	2.33042
Biological process	RNA modification	8	0.00960537	1.73231
Biological process	actomyosin contractile ring contraction	6	0.00964512	2.66551
Biological process	contractile ring contraction	5	0.00964512	2.66551
Biological process	cellular modified amino acid biosynthetic process	6	0.00964512	2.66551
Biological process	regulation of protein localization to cell periphery	7	0.0105789	1.95707
Biological process	organonitrogen compound biosynthetic process	5	0.0106047	1.20479
Biological process	positive regulation of axonogenesis	10	0.0113806	1.88807
Biological process	cholesterol metabolic process	7	0.0116556	2.15779
Biological process	cytokinesis	4	0.0125898	1.47963
Biological process	fertilization	3	0.0127496	1.74678
Biological process	purine nucleotide metabolic process	9	0.0129647	1.40428
Biological process	regulation of Toll signaling pathway	7	0.0131969	2.77431
Biological process	negative regulation of lipid storage	7	0.0131969	2.77431
Biological process	fusome organization	6	0.0131969	2.77431
Biological process	ovarian fusome organization	7	0.0131969	2.77431
Biological process	positive regulation of sterol transport	10	0.0131969	2.77431
Biological process	positive regulation of cholesterol transport	11	0.0131969	2.77431
Biological process	rhabdomere development	6	0.013394	2.35396
Biological process	cytoskeleton-dependent cytokinesis	5	0.0147658	1.51984
Biological process	melanin metabolic process	6	0.0148839	2.08819
Biological process	ATP synthesis coupled electron transport	7	0.0164107	2.15779
Biological process	mitochondrial ATP synthesis coupled electron transport	8	0.0164107	2.15779
Biological process	tRNA modification	11	0.0166327	1.97798
Biological process	sterol metabolic process	6	0.0166327	1.97798
Biological process	positive regulation of cell morphogenesis involved in differentiation	8	0.0166762	1.58238
Biological process	regulation of ubiquitin-protein transferase activity	6	0.0178222	2.25161
Biological process	positive regulation of telomerase activity	10	0.0178222	2.25161
Biological process	histone mRNA catabolic process	11	0.0178637	2.94244
Biological process	respiratory electron transport chain	6	0.017945	1.89465
Biological process	positive regulation of lipid transport	9	0.017945	1.89465
Biological process	protein lipidation	8	0.0188923	1.82943
Biological process	lipoprotein biosynthetic process	7	0.0188923	1.82943
Biological process	purine ribonucleotide metabolic process	10	0.0190209	1.41997
Biological process	centriole-centriole cohesion	4	0.0191747	2.58935
Biological process	tRNA methylation	12	0.0191747	2.58935
Biological process	regulation of telomerase activity	9	0.0195389	1.77701
Biological process	carbohydrate derivative metabolic process	4	0.019675	1.23734
Biological process	positive regulation of transferase activity	6	0.0207128	1.37003
Biological process	response to UV	6	0.0215014	1.43339
Biological process	regulation of microtubule polymerization or depolymerization	9	0.0225387	1.79051
Biological process	nucleobase-containing compound transport	8	0.022725	1.46875
Biological process	ribonucleotide metabolic process	9	0.0227922	1.40188
Biological process	positive regulation of lipid localization	6	0.0230589	1.74283
Biological process	positive regulation of telomere maintenance via telomerase	11	0.0232087	2.15779
Biological process	protein deubiquitination	10	0.0232835	1.6425
Biological process	purine-containing compound metabolic process	5	0.0239748	1.34595
Biological process	regulation of lipid localization	5	0.0246619	1.54478
Biological process	GPI anchor biosynthetic process	10	0.0252803	2.26568
Biological process	ribose phosphate metabolic process	6	0.0259417	1.38151
Biological process	single fertilization	4	0.0260035	1.80652
Biological process	activation of MAPKK activity	13	0.0267611	2.42752
Biological process	regulation of sterol transport	9	0.0267611	2.42752
Biological process	regulation of cholesterol transport	10	0.0267611	2.42752
Biological process	stress granule assembly	7	0.0268007	2.69724
Biological process	histone H2A acetylation	13	0.0268007	2.69724
Biological process	mRNA methylation	10	0.0268007	2.69724
Biological process	cell-cell junction assembly	7	0.0270049	1.64403
Biological process	regulation of microtubule polymerization	10	0.0296434	2.07148
Biological process	tight junction organization	7	0.0300026	1.82582
Biological process	tight junction assembly	8	0.0300026	1.82582
Biological process	pigment metabolic process	3	0.0310271	1.61834
Biological process	actomyosin contractile ring organization	9	0.0326428	1.94201
Biological process	protein modification by small protein removal	9	0.0330385	1.53743
Biological process	positive regulation of cell growth	7	0.0332219	1.44495
Biological process	RNA catabolic process	8	0.0336899	1.42099
Biological process	regulation of cell growth	6	0.0354956	1.30683
Biological process	regulation of protein localization to membrane	7	0.0360559	1.61834
Biological process	phosphatidylinositol metabolic process	8	0.0360559	1.61834
Biological process	regulation of synaptic plasticity	8	0.0360559	1.61834
Biological process	positive regulation of mitochondrial translation	10	0.0360971	2.28472
Biological process	regulation of digestive system process	6	0.0360971	2.28472
Biological process	RNA-dependent DNA biosynthetic process	9	0.0364526	1.64777
Biological process	telomere maintenance via telomerase	10	0.0364526	1.64777
Biological process	regulation of lipid transport	8	0.0364526	1.64777
Biological process	DNA metabolic process	7	0.0370591	1.18252
Biological process	regulation of embryonic cell shape	8	0.0372054	1.99181
Biological process	pigment granule transport	8	0.0381418	2.48976
Biological process	establishment of protein localization to chromosome	8	0.0381418	2.48976
Biological process	melanosome transport	9	0.0381418	2.48976
Biological process	regulation of production of molecular mediator of immune response	7	0.0393688	1.54996
Biological process	regulation of DNA metabolic process	7	0.0395149	1.27388
Biological process	nucleic acid transport	9	0.0397741	1.44551
Biological process	RNA transport	10	0.0397741	1.44551
Biological process	sterol transport	9	0.0399078	1.87937
Biological process	regulation of cell morphogenesis involved in differentiation	7	0.0410315	1.30775
Biological process	glycerolipid biosynthetic process	7	0.0412452	1.59181
Biological process	positive regulation of MAPK cascade	9	0.0414411	1.35391
Biological process	positive regulation of axon extension	11	0.0415264	1.79816
Biological process	protein K48-linked deubiquitination	11	0.0421604	2.05971
Biological process	regulation of locomotion involved in locomotory behavior	5	0.0421604	2.05971
Biological process	positive regulation of JUN kinase activity	14	0.0421604	2.05971
Biological process	chaperone-mediated protein folding	4	0.0421604	2.05971
Biological process	locomotion involved in locomotory behavior	3	0.0421604	2.05971
Biological process	cellular macromolecule catabolic process	6	0.0422281	1.17811
Biological process	glycerolipid metabolic process	6	0.0423323	1.40257
Biological process	regulation of nervous system process	6	0.0423566	1.73676
Biological process	liposaccharide metabolic process	5	0.0424393	1.65008
Biological process	regulation of telomere maintenance via telomerase	10	0.0424393	1.65008
Biological process	cytokinetic process	4	0.04261	1.68871
Biological process	metabolic process	2	0.0429945	1.03574
Biological process	regulation of JNK cascade	10	0.043898	1.43161
Biological process	nucleobase-containing compound catabolic process	6	0.0439951	1.30118
Biological process	obsolete cofactor biosynthetic process	0	0.0464745	1.48186
Biological process	protein localization to Golgi apparatus	7	0.0472867	2.15779
Biological process	cystoblast division	5	0.0472867	2.15779
Biological process	secondary metabolic process	3	0.0480233	1.58995
Biological process	translational initiation	4	0.0480233	1.58995
Biological process	regulation of transferase activity	5	0.048696	1.2115

## Sheet: Table S5
Table S5 Gene annotation of mortality-associated canonical immune genes in larvae and adult
	Gene Id	Interprosan Annotation	Swissprot Annotation
larvae-specific	OYG_10000016	IPR001304; C-type lectin IPR016187; C-type lectin fold	C-type lectin domain family 4 member
	OYG_10000028	IPR004113; FAD-linked oxidase, C-terminal IPR016164; FAD-linked oxidase-like, C-terminal	D-2-hydroxyglutarate dehydrogenase, mitochondrial
	OYG_10000068	NA	NA
	OYG_10000154	NA	NA
	OYG_10000248	IPR000372; Leucine-rich repeat-containing N-terminal IPR000483; Cysteine-rich flanking region, C-terminal domain IPR001611; Leucine-rich repeat IPR003591; Leucine-rich repeat, typical subtype	Leucine-rich repeat transmembrane protein FLRT1
	OYG_10000466	IPR000719; Protein kinase, catalytic domain IPR001245; Serine-threonine/tyrosine-protein kinase IPR002290; Serine/threonine-protein kinase domain IPR011009; Protein kinase-like domain IPR020635; Tyrosine-protein kinase, catalytic domain	Ephrin type-A receptor 7
	OYG_10000483	IPR002557; Chitin binding domain	NA
	OYG_10001063	NA	NA
	OYG_10001455	IPR001073; Complement C1q protein IPR008983; Tumour necrosis factor-like	NA
	OYG_10001591	IPR000719; Protein kinase, catalytic domain IPR001245; Serine-threonine/tyrosine-protein kinase IPR002290; Serine/threonine-protein kinase domain IPR011009; Protein kinase-like domain IPR020635; Tyrosine-protein kinase, catalytic domain	Tyrosine-protein kinase SYK
	OYG_10001707	NA	tRNA-dihydrouridine synthase 3-like
	OYG_10001708	IPR001304; C-type lectin IPR016187; C-type lectin fold	NA
	OYG_10001975	IPR002502; N-acetylmuramoyl-L-alanine amidase, family 2 IPR006619; Peptidoglycan recognition protein, metazoa/bacteria	N-acetylmuramoyl-L-alanine amidase
	OYG_10001976	IPR006052; Tumour necrosis factor	NA
	OYG_10002102	IPR001073; Complement C1q protein IPR008983; Tumour necrosis factor-like	Collagen alpha-2(VIII) chain
	OYG_10002148	IPR002181; Fibrinogen, alpha/beta/gamma chain, C-terminal globular IPR003014; PAN-1 domain IPR003609; Apple-like	Ficolin-2 like
	OYG_10002149	IPR002181; Fibrinogen, alpha/beta/gamma chain, C-terminal globular IPR003014; PAN-1 domain	Ficolin-2 like
	OYG_10002293	IPR001611; Leucine-rich repeat IPR003591; Leucine-rich repeat, typical subtype	Leucine-rich repeat-containing protein 63
	OYG_10002699	IPR003590; Leucine-rich repeat, ribonuclease inhibitor subtype	Uncharacterized protein C6orf154
	OYG_10002812	IPR002305; Aminoacyl-tRNA synthetase, class Ib IPR002306; Tryptophanyl-tRNA synthetase, class Ib	Tryptophanyl-tRNA synthetase, cytoplasmic
	OYG_10003134	IPR000157; Toll-Interleukin receptor IPR000742; Epidermal growth factor-like, type 3 IPR004075; Interleukin-1 receptor, type I/Toll precursor IPR006210; Epidermal growth factor-like	Protein toll
	OYG_10003144	IPR001304; C-type lectin IPR016187; C-type lectin fold	C-type lectin domain family 10 member A
	OYG_10003354	IPR010582; Catalase-related immune responsive IPR011614; Catalase, N-terminal IPR018028; Catalase-related subgroup IPR020835; Catalase-like domain, haem-dependent	Catalase
	OYG_10003355	IPR010582; Catalase-related immune responsive IPR011614; Catalase, N-terminal IPR018028; Catalase-related subgroup IPR020835; Catalase-like domain, haem-dependent	Catalase
	OYG_10003693	IPR018094; Thymidylate kinase	UMP-CMP kinase 2, mitochondrial
	OYG_10003747	IPR001304; C-type lectin IPR016187; C-type lectin fold	Brevican core protein
	OYG_10003823	IPR001304; C-type lectin IPR009886; HCaRG IPR016187; C-type lectin fold	COMM domain-containing protein 3
	OYG_10004025	IPR001190; Speract/scavenger receptor IPR017448; Speract/scavenger receptor-related	Deleted in malignant brain tumors 1 protein
	OYG_10004027	NA	Epithelial-stromal interaction protein 1
	OYG_10004089	IPR001810; F-box domain, cyclin-like IPR022364; F-box domain, Skp2-like	NA
	OYG_10004409	IPR002181; Fibrinogen, alpha/beta/gamma chain, C-terminal globular	Angiopoietin-2
	OYG_10004547	NA	NA
	OYG_10005171	IPR003582; Metridin-like ShK toxin	NA
	OYG_10005275	IPR002181; Fibrinogen, alpha/beta/gamma chain, C-terminal globular	Fibroleukin
	OYG_10005326	IPR001304; C-type lectin IPR002353; Type II antifreeze protein IPR016187; C-type lectin fold	Collectin-12
	OYG_10005393	IPR001370; Baculoviral inhibition of apoptosis protein repeat IPR001841; Zinc finger, RING-type	Inhibitor of apoptosis protein
	OYG_10005873	IPR001394; Peptidase C19, ubiquitin carboxyl-terminal hydrolase 2 IPR002867; Zinc finger, C6HC-type	Ubiquitin carboxyl-terminal hydrolase 27
	OYG_10006059	IPR001611; Leucine-rich repeat IPR003591; Leucine-rich repeat, typical subtype IPR009003; Peptidase cysteine/serine, trypsin-like	Insulin-like growth factor-binding protein complex acid labile chain
	OYG_10006214	IPR001611; Leucine-rich repeat	Leucine-rich repeat-containing protein 48
	OYG_10006248	IPR002745; Phosphotransferase KptA/Tpt1	tRNA 2'-phosphotransferase 1
	OYG_10006294	IPR001368; TNFR/CD27/30/40/95 cysteine-rich region IPR001926; Pyridoxal phosphate-dependent enzyme, beta subunit	Threonine dehydratase biosynthetic
	OYG_10006477	IPR003959; ATPase, AAA-type, core	RING finger protein 213
	OYG_10006487	IPR000938; Cytoskeleton-associated protein, Gly-rich domain	Tubulin-folding cofactor B
	OYG_10006675	IPR002181; Fibrinogen, alpha/beta/gamma chain, C-terminal globular	Tenascin-R
	OYG_10006941	NA	UPF0669 protein C6orf120 homolog
	OYG_10007060	IPR006921; Interferon-related developmental regulator, C-terminal IPR007701; Interferon-related developmental regulator, N-terminal IPR016024; Armadillo-type fold	Interferon-related developmental regulator 1
	OYG_10007177	IPR011641; Tyrosine-protein kinase ephrin type A/B receptor-like	Sushi, von Willebrand factor type A, EGF and pentraxin domain-containing protein 1
	OYG_10007361	NA	RING finger protein 213
	OYG_10007847	IPR000421; Coagulation factor 5/8 type, C-terminal IPR006585; Fucolectin tachylectin-4 pentraxin-1 IPR008979; Galactose-binding domain-like	Fucolectin-1
	OYG_10008380	IPR001073; Complement C1q protein IPR008983; Tumour necrosis factor-like	NA
	OYG_10008438	IPR001073; Complement C1q protein IPR008983; Tumour necrosis factor-like	Multimerin-1
	OYG_10009013	NA	UPF0474 protein CG13624
	OYG_10009722	IPR006935; Restriction endonuclease, type I, R subunit/Type III, Res subunit	Putative helicase MOV-10
	OYG_10009870	NA	NA
	OYG_10010004	IPR001304; C-type lectin IPR016187; C-type lectin fold	Perlucin
	OYG_10010033	IPR001304; C-type lectin IPR016187; C-type lectin fold	Tetranectin-like protein
	OYG_10010262	IPR001073; Complement C1q protein IPR008983; Tumour necrosis factor-like	Complement C1q-like protein 4
	OYG_10010437	IPR000276; 7TM GPCR, rhodopsin-like IPR001073; Complement C1q protein IPR008983; Tumour necrosis factor-like IPR017452; GPCR, rhodopsin-like superfamily	Trace amine-associated receptor 5
	OYG_10010773	IPR006571; TLDc	Interferon-induced protein 44
	OYG_10011215	NA	NA
	OYG_10011216	NA	NA
	OYG_10011239	IPR003590; Leucine-rich repeat, ribonuclease inhibitor subtype	Leucine-rich repeat-containing protein C10orf92
	OYG_10011621	IPR001073; Complement C1q protein IPR008983; Tumour necrosis factor-like	Complement C1q-like protein 4
	OYG_10011670	IPR001304; C-type lectin IPR016187; C-type lectin fold	Low affinity immunoglobulin epsilon Fc receptor
	OYG_10011735	NA	Insulin-like growth factor-binding protein complex acid labile chain
	OYG_10012280	IPR002181; Fibrinogen, alpha/beta/gamma chain, C-terminal globular	Tenascin-R
	OYG_10013069	IPR001073; Complement C1q protein IPR008983; Tumour necrosis factor-like	Caprin-2
	OYG_10013073	IPR001073; Complement C1q protein IPR008983; Tumour necrosis factor-like	Complement C1q tumor necrosis factor-related protein 2
	OYG_10013362	IPR001073; Complement C1q protein IPR008983; Tumour necrosis factor-like	Caprin-2
	OYG_10013675	IPR002181; Fibrinogen, alpha/beta/gamma chain, C-terminal globular	Fibrinogen C domain-containing protein 1-A
	OYG_10013832	IPR005647; Meiotic nuclear division protein 1	Meiotic nuclear division protein 1 homolog
	OYG_10014075	NA	Cysteine-rich motor neuron 1 protein
	OYG_10014533	IPR000038; Cell division/GTP binding protein	Interferon-induced protein 44-like
	OYG_10014674	IPR001611; Leucine-rich repeat	Nischarin
	OYG_10014830	IPR001304; C-type lectin IPR016187; C-type lectin fold	Aggrecan core protein
	OYG_10015451	IPR001079; Galectin, carbohydrate recognition domain IPR008985; Concanavalin A-like lectin/glucanase	Galectin-4
	OYG_10015627	IPR001304; C-type lectin IPR016187; C-type lectin fold	Collectin-12
	OYG_10015771	IPR000210; BTB/POZ-like IPR011333; BTB/POZ fold IPR013069; BTB/POZ	Kelch-like protein 28
	OYG_10016022	IPR001073; Complement C1q protein IPR008983; Tumour necrosis factor-like	Complement C1q-like protein 2
	OYG_10016296	IPR002181; Fibrinogen, alpha/beta/gamma chain, C-terminal globular	Tenascin-R
	OYG_10017357	NA	Thymidine kinase 2, mitochondrial
	OYG_10017365	IPR001073; Complement C1q protein IPR008983; Tumour necrosis factor-like	Complement C1q tumor necrosis factor-related protein 3
	OYG_10017463	IPR001304; C-type lectin IPR002353; Type II antifreeze protein IPR016187; C-type lectin fold	C-type lectin domain family 4 member M
	OYG_10017712	IPR001806; Ras GTPase IPR003577; Ras small GTPase, Ras type IPR003578; Small GTPase, Rho type IPR003579; Ras small GTPase, Rab type IPR013753; Ras	Ras-like GTP-binding protein Rho1
	OYG_10017882	IPR004302; Chitin-binding, domain 3	NA
	OYG_10018181	IPR000782; FAS1 domain	Uncharacterized protein sll1735
	OYG_10018631	NA	NA
	OYG_10018639	IPR001073; Complement C1q protein IPR008983; Tumour necrosis factor-like	Caprin-2
	OYG_10018666	NA	Cystatin-A2
	OYG_10018708	IPR002181; Fibrinogen, alpha/beta/gamma chain, C-terminal globular	Tenascin-R
	OYG_10018813	IPR001304; C-type lectin IPR016187; C-type lectin fold	Aggrecan core protein
	OYG_10019058	IPR002181; Fibrinogen, alpha/beta/gamma chain, C-terminal globular IPR013026; Tetratricopeptide repeat-containing	26S proteasome non-ATPase regulatory subunit 3
	OYG_10019601	IPR000276; 7TM GPCR, rhodopsin-like IPR001073; Complement C1q protein IPR008983; Tumour necrosis factor-like IPR017452; GPCR, rhodopsin-like superfamily	Kappa-type opioid receptor
	OYG_10019984	IPR000488; Death IPR001368; TNFR/CD27/30/40/95 cysteine-rich region	NA
	OYG_10020666	IPR001073; Complement C1q protein IPR008983; Tumour necrosis factor-like	EMILIN-2
	OYG_10020777	IPR000058; Zinc finger, AN1-type IPR003903; Ubiquitin interacting motif	AN1-type zinc finger protein 2B
	OYG_10021170	IPR001346; Interferon regulatory factor	Interferon regulatory factor 2
	OYG_10021922	IPR000330; SNF2-related	Helicase ARIP4
	OYG_10022335	IPR002181; Fibrinogen, alpha/beta/gamma chain, C-terminal globular	Tenascin
	OYG_10022765	IPR018094; Thymidylate kinase	UMP-CMP kinase 2, mitochondrial
	OYG_10023403	IPR000157; Toll-Interleukin receptor IPR000742; Epidermal growth factor-like, type 3 IPR006210; Epidermal growth factor-like	Sushi, nidogen and EGF-like domain-containing protein 1
	OYG_10023641	IPR001870; B302/SPRY domain IPR003877; SPla/RYanodine receptor SPRY IPR008985; Concanavalin A-like lectin/glucanase IPR018355; SPla/RYanodine receptor subgroup	SPRY domain-containing protein 3
	OYG_10023781	IPR006046; Glycoside hydrolase, family 13 IPR006047; Glycosyl hydrolase, family 13, catalytic domain IPR006048; Alpha-amylase, C-terminal all beta IPR006589; Glycosyl hydrolase, family 13, subfamily, catalytic domain IPR017853; Glycoside hydrolase, catalytic core	Alpha-amylase 1
	OYG_10023843	IPR001073; Complement C1q protein IPR008983; Tumour necrosis factor-like	Heavy metal-binding protein HIP
	OYG_10024071	IPR006571; TLDc	Interferon-induced protein 44-like
	OYG_10024072	IPR006571; TLDc	Interferon-induced protein 44-like
	OYG_10024232	IPR001073; Complement C1q protein IPR008983; Tumour necrosis factor-like	NA
	OYG_10024487	IPR020864; Membrane attack complex component/perforin (MACPF) domain	NA
	OYG_10024657	NA	NA
	OYG_10025581	IPR001073; Complement C1q protein IPR008983; Tumour necrosis factor-like	Complement C1q tumor necrosis factor-related protein 3
	OYG_10026092	IPR000157; Toll-Interleukin receptor IPR000488; Death IPR011029; DEATH-like	Myeloid differentiation primary response protein MyD88
	OYG_10026200	IPR002181; Fibrinogen, alpha/beta/gamma chain, C-terminal globular IPR003014; PAN-1 domain IPR003609; Apple-like	Ficolin-2
	OYG_10026789	IPR000235; Ribosomal protein S7	28S ribosomal protein S7, mitochondrial
	OYG_10026905	IPR001073; Complement C1q protein IPR008983; Tumour necrosis factor-like	Complement C1q-like protein 4
	OYG_10026977	IPR001304; C-type lectin IPR016187; C-type lectin fold	C-type lectin domain family 5 member A
	OYG_10027438	NA	Zygote arrest protein 1
	OYG_10027663	IPR001611; Leucine-rich repeat	Leucine-rich repeat-containing protein 67
	OYG_10027804	IPR000421; Coagulation factor 5/8 type, C-terminal IPR008979; Galactose-binding domain-like	Lactadherin
	OYG_10027917	IPR012336; Thioredoxin-like fold IPR013740; Redoxin IPR017936; Thioredoxin-like	Peroxiredoxin-5, mitochondrial
	OYG_10028418	IPR002035; von Willebrand factor, type A	Putative ariadne-like RING finger protein R811
	OYG_10028907	IPR002181; Fibrinogen, alpha/beta/gamma chain, C-terminal globular	Ficolin-2
adult-specific	OYG_10000088	IPR002181; Fibrinogen, alpha/beta/gamma chain, C-terminal globular	Angiopoietin-4
	OYG_10000191	IPR001269; tRNA-dihydrouridine synthase	tRNA-dihydrouridine synthase 3-like
	OYG_10000492	IPR018249; EF-HAND 2	NA
	OYG_10000576	IPR008985; Concanavalin A-like lectin/glucanase	Beta-1,3-glucan-binding protein
	OYG_10000643	IPR002181; Fibrinogen, alpha/beta/gamma chain, C-terminal globular	Ficolin-1
	OYG_10000767	NA	Coiled-coil domain-containing protein C6orf185
	OYG_10000860	IPR020683; Ankyrin repeat-containing domain	NA
	OYG_10000903	IPR003903; Ubiquitin interacting motif	Coiled-coil domain-containing protein 104
	OYG_10001003	IPR006652; Kelch repeat type 1	Kelch-like protein 13
	OYG_10001122	IPR000157; Toll-Interleukin receptor IPR004075; Interleukin-1 receptor, type I/Toll precursor	Toll-like receptor 2 type-2
	OYG_10001123	IPR001680; WD40 repeat IPR002007; Haem peroxidase, animal IPR010255; Haem peroxidase IPR011046; WD40 repeat-like-containing domain IPR017986; WD40-repeat-containing domain IPR019781; WD40 repeat, subgroup IPR019782; WD40 repeat 2 IPR019791; Haem peroxidase, animal, subgroup	Chorion peroxidase
	OYG_10001246	IPR002867; Zinc finger, C6HC-type	Probable E3 ubiquitin-protein ligase RNF144A
	OYG_10001281	IPR001701; Glycoside hydrolase, family 9 IPR008928; Six-hairpin glycosidase-like IPR008965; Carbohydrate-binding	Endoglucanase E-4
	OYG_10001352	IPR002181; Fibrinogen, alpha/beta/gamma chain, C-terminal globular	Ficolin-2
	OYG_10001400	IPR000719; Protein kinase, catalytic domain IPR001304; C-type lectin IPR002290; Serine/threonine-protein kinase domain IPR011009; Protein kinase-like domain IPR016187; C-type lectin fold IPR017442; Serine/threonine-protein kinase-like domain	Cell division protein kinase 6
	OYG_10001428	IPR001073; Complement C1q protein IPR008983; Tumour necrosis factor-like	Multimerin-1
	OYG_10001434	IPR001304; C-type lectin IPR016187; C-type lectin fold	NA
	OYG_10001483	IPR001073; Complement C1q protein IPR008983; Tumour necrosis factor-like	Complement C1q-like protein 4
	OYG_10001510	IPR001190; Speract/scavenger receptor IPR017448; Speract/scavenger receptor-related	Scavenger receptor cysteine-rich type 1 protein M130
	OYG_10001514	IPR001073; Complement C1q protein IPR008983; Tumour necrosis factor-like IPR012816; Conserved hypothetical protein CHP02464	Complement C1q-like protein 3
	OYG_10001534	IPR001073; Complement C1q protein IPR008983; Tumour necrosis factor-like	Caprin-2
	OYG_10001545	IPR002502; N-acetylmuramoyl-L-alanine amidase, family 2 IPR006619; Peptidoglycan recognition protein, metazoa/bacteria	Peptidoglycan recognition protein
	OYG_10001569	IPR001752; Kinesin, motor domain IPR009053; Prefoldin	Centromere-associated protein E
	OYG_10001635	IPR000038; Cell division/GTP binding protein	Interferon-induced protein 44-like
	OYG_10001743	IPR001304; C-type lectin IPR016187; C-type lectin fold	C-type mannose receptor 2
	OYG_10001779	IPR001073; Complement C1q protein IPR008983; Tumour necrosis factor-like	Complement C1q tumor necrosis factor-related protein 2
	OYG_10001781	IPR001073; Complement C1q protein IPR008983; Tumour necrosis factor-like	NA
	OYG_10001798	IPR001580; Calreticulin/calnexin IPR009033; Calreticulin/calnexin, P	Calreticulin
	OYG_10001858	NA	NA
	OYG_10001936	IPR001509; NAD-dependent epimerase/dehydratase	L-threonine 3-dehydrogenase, mitochondrial
	OYG_10002044	IPR002181; Fibrinogen, alpha/beta/gamma chain, C-terminal globular	Angiopoietin-4
	OYG_10002045	IPR002181; Fibrinogen, alpha/beta/gamma chain, C-terminal globular	Angiopoietin-1
	OYG_10002180	IPR003117; cAMP-dependent protein kinase, regulatory subunit, type I/II alpha/beta IPR007858; Dpy-30 motif IPR018249; EF-HAND 2	EF-hand domain-containing protein LOC100130771 homolog
	OYG_10002181	IPR020864; Membrane attack complex component/perforin (MACPF) domain	Macrophage-expressed gene 1 protein
	OYG_10002191	IPR003594; ATPase-like, ATP-binding domain	Sacsin
	OYG_10002235	IPR001073; Complement C1q protein IPR008983; Tumour necrosis factor-like	Heavy metal-binding protein HIP
	OYG_10002258	IPR002181; Fibrinogen, alpha/beta/gamma chain, C-terminal globular	Tenascin-R
	OYG_10002356	NA	NA
	OYG_10002370	IPR002181; Fibrinogen, alpha/beta/gamma chain, C-terminal globular	Fibroleukin
	OYG_10002381	IPR001841; Zinc finger, RING-type IPR002589; Appr-1-p processing IPR018957; Zinc finger, C3HC4 RING-type	Protein deltex-3-like
	OYG_10002384	IPR000001; Kringle IPR013806; Kringle-like fold	Plasminogen
	OYG_10002385	IPR000001; Kringle IPR000922; D-galactoside/L-rhamnose binding SUEL lectin domain IPR002889; Carbohydrate-binding WSC IPR011052; Proteinase/amylase inhibitor domain IPR013806; Kringle-like fold IPR013994; Carbohydrate-binding WSC, subgroup	Plasminogen
	OYG_10002387	IPR001023; Heat shock protein Hsp70 IPR013126; Heat shock protein 70	Heat shock 70 kDa protein 12B
	OYG_10002389	IPR001073; Complement C1q protein IPR008983; Tumour necrosis factor-like	Complement C1q tumor necrosis factor-related protein 3
	OYG_10002404	IPR000001; Kringle IPR013806; Kringle-like fold	Plasminogen
	OYG_10002411	IPR008979; Galactose-binding domain-like	NA
	OYG_10002472	IPR000315; Zinc finger, B-box IPR001841; Zinc finger, RING-type IPR018957; Zinc finger, C3HC4 RING-type	Tripartite motif-containing protein 45
	OYG_10002498	IPR001073; Complement C1q protein IPR008983; Tumour necrosis factor-like	Complement C1q-like protein 4
	OYG_10002512	IPR013568; SEFIR	Interleukin-17 receptor D
	OYG_10002570	IPR006840; ChaC-like protein	Cation transport regulator-like protein 1
	OYG_10002587	IPR001611; Leucine-rich repeat IPR003591; Leucine-rich repeat, typical subtype	Ras suppressor protein 1
	OYG_10002615	IPR001073; Complement C1q protein IPR008983; Tumour necrosis factor-like	Complement C1q-like protein 2
	OYG_10002616	IPR000742; Epidermal growth factor-like, type 3 IPR001881; EGF-like calcium-binding IPR006209; EGF IPR006210; Epidermal growth factor-like IPR013111; EGF, extracellular	Fibropellin-1
	OYG_10002633	IPR001073; Complement C1q protein IPR008983; Tumour necrosis factor-like	Heavy metal-binding protein HIP
	OYG_10002646	IPR002557; Chitin binding domain	NA
	OYG_10002778	IPR002110; Ankyrin repeat IPR020683; Ankyrin repeat-containing domain	Ankyrin-1
	OYG_10002780	NA	Tripartite motif-containing protein 2
	OYG_10002821	IPR001073; Complement C1q protein IPR008983; Tumour necrosis factor-like	Heavy metal-binding protein HIP
	OYG_10002841	IPR001293; Zinc finger, TRAF-type IPR002083; MATH IPR008974; TRAF-like IPR013010; Zinc finger, SIAH-type IPR018957; Zinc finger, C3HC4 RING-type	TNF receptor-associated factor 3
	OYG_10002875	NA	NA
	OYG_10002889	NA	NA
	OYG_10002908	IPR002181; Fibrinogen, alpha/beta/gamma chain, C-terminal globular	Fibrinogen-like protein 1
	OYG_10002968	NA	Tripartite motif-containing protein 2
	OYG_10002982	IPR006694; Fatty acid hydroxylase	Uncharacterized protein C5orf4 homolog
	OYG_10002984	IPR001368; TNFR/CD27/30/40/95 cysteine-rich region IPR011029; DEATH-like	Tumor necrosis factor receptor superfamily member 5
	OYG_10003002	IPR001304; C-type lectin IPR016187; C-type lectin fold	NA
	OYG_10003003	IPR001304; C-type lectin IPR016187; C-type lectin fold	NA
	OYG_10003004	IPR001304; C-type lectin IPR016187; C-type lectin fold	NA
	OYG_10003063	IPR002181; Fibrinogen, alpha/beta/gamma chain, C-terminal globular	Tenascin
	OYG_10003079	NA	Transmembrane protein 173
	OYG_10003083	IPR001650; Helicase, C-terminal IPR021673; C-terminal domain of RIG-I	Probable ATP-dependent RNA helicase DHX58
	OYG_10003119	IPR001304; C-type lectin IPR016187; C-type lectin fold	Neurocan core protein
	OYG_10003150	IPR006029; Neurotransmitter-gated ion-channel transmembrane domain IPR006201; Neurotransmitter-gated ion-channel IPR006202; Neurotransmitter-gated ion-channel ligand-binding	Neuronal acetylcholine receptor subunit alpha-3
	OYG_10003174	IPR009051; Alpha-helical ferredoxin IPR012135; Dihydroorotate dehydrogenase, class 1/ 2 IPR013027; FAD-dependent pyridine nucleotide-disulphide oxidoreductase	Dihydropyrimidine dehydrogenase [NADP+]
	OYG_10003183	NA	SAM domain and HD domain-containing protein 1
	OYG_10003221	IPR001304; C-type lectin IPR016187; C-type lectin fold	NA
	OYG_10003222	IPR002048; Calcium-binding EF-hand IPR003590; Leucine-rich repeat, ribonuclease inhibitor subtype IPR018249; EF-HAND 2	Uncharacterized protein C14orf166B
	OYG_10003223	IPR003590; Leucine-rich repeat, ribonuclease inhibitor subtype	Uncharacterized protein C14orf166B homolog
	OYG_10003270	IPR001346; Interferon regulatory factor IPR008984; SMAD/FHA domain IPR019471; Interferon regulatory factor-3	Interferon regulatory factor 8
	OYG_10003302	IPR002181; Fibrinogen, alpha/beta/gamma chain, C-terminal globular	Angiopoietin-related protein 2
	OYG_10003303	IPR002181; Fibrinogen, alpha/beta/gamma chain, C-terminal globular	Angiopoietin-4
	OYG_10003304	IPR002181; Fibrinogen, alpha/beta/gamma chain, C-terminal globular	Angiopoietin-4
	OYG_10003321	NA	Polysialoglycoprotein
	OYG_10003326	IPR006612; Zinc finger, C2CH-type	NA
	OYG_10003349	NA	NA
	OYG_10003430	NA	Tenascin-R
	OYG_10003431	NA	Uromodulin
	OYG_10003464	IPR016166; FAD-binding, type 2	NA
	OYG_10003468	IPR001611; Leucine-rich repeat IPR003591; Leucine-rich repeat, typical subtype IPR007122; Gelsolin IPR007123; Gelsolin domain	Protein flightless-1 homolog
	OYG_10003564	IPR000668; Peptidase C1A, papain C-terminal IPR013201; Proteinase inhibitor I29, cathepsin propeptide	Cathepsin L
	OYG_10003566	IPR000668; Peptidase C1A, papain C-terminal	Cathepsin L
	OYG_10003567	IPR000157; Toll-Interleukin receptor IPR004075; Interleukin-1 receptor, type I/Toll precursor	Toll-like receptor 2 type-2
	OYG_10003569	IPR000157; Toll-Interleukin receptor IPR004075; Interleukin-1 receptor, type I/Toll precursor	Toll-like receptor 2
	OYG_10003571	NA	NA
	OYG_10003573	IPR021757; Ribosomal protein L46	39S ribosomal protein L46, mitochondrial
	OYG_10003575	IPR000157; Toll-Interleukin receptor IPR004075; Interleukin-1 receptor, type I/Toll precursor	Toll-like receptor 6
	OYG_10003576	IPR000157; Toll-Interleukin receptor	Toll-like receptor 13
	OYG_10003577	IPR000157; Toll-Interleukin receptor IPR004075; Interleukin-1 receptor, type I/Toll precursor	Toll-like receptor 6
	OYG_10003627	IPR004455; NADP oxidoreductase, coenzyme F420-dependent IPR013130; Flavoprotein transmembrane component	Metalloreductase STEAP2
	OYG_10003633	IPR001580; Calreticulin/calnexin IPR008985; Concanavalin A-like lectin/glucanase IPR009033; Calreticulin/calnexin, P	Calnexin
	OYG_10003639	NA	NA
	OYG_10003643	IPR001304; C-type lectin IPR016187; C-type lectin fold	C-type mannose receptor 2
	OYG_10003661	IPR006055; Exonuclease IPR012337; Ribonuclease H-like IPR013520; Exonuclease, RNase T/DNA polymerase III	DNA polymerase III polC-type
	OYG_10003727	NA	Pathogen-related protein
	OYG_10003729	IPR001599; Alpha-2-macroglobulin IPR008930; Terpenoid cylases/protein prenyltransferase alpha-alpha toroid IPR009048; Alpha-macroglobulin, receptor-binding IPR011626; A-macroglobulin complement component IPR019565; Alpha-2-macroglobulin, thiol-ester bond-forming	CD109 antigen
	OYG_10003766	IPR000488; Death IPR001368; TNFR/CD27/30/40/95 cysteine-rich region IPR011029; DEATH-like	Tumor necrosis factor receptor superfamily member 16
	OYG_10003810	IPR000175; Sodium:neurotransmitter symporter	Sodium- and chloride-dependent glycine transporter 2
	OYG_10003864	IPR001611; Leucine-rich repeat IPR003591; Leucine-rich repeat, typical subtype	Ras suppressor protein 1
	OYG_10003866	IPR003689; Zinc/iron permease	Zinc transporter ZIP12
	OYG_10003902	IPR002181; Fibrinogen, alpha/beta/gamma chain, C-terminal globular IPR003014; PAN-1 domain	Ficolin-2
	OYG_10003934	IPR001073; Complement C1q protein IPR008983; Tumour necrosis factor-like	Collagen alpha-2(VIII) chain
	OYG_10004062	NA	NA
	OYG_10004085	IPR012937; Domain of unknown function DUF1693	Protein FAM46A
	OYG_10004099	IPR001680; WD40 repeat IPR011046; WD40 repeat-like-containing domain IPR017986; WD40-repeat-containing domain IPR019781; WD40 repeat, subgroup IPR019782; WD40 repeat 2	Uncharacterized WD repeat-containing protein alr2800
	OYG_10004144	NA	Endothelial cells scavenger receptor
	OYG_10004145	IPR008597; Destabilase	Lysozyme
	OYG_10004149	IPR000436; Sushi/SCR/CCP IPR016060; Complement control module	Complement factor B
	OYG_10004156	IPR000719; Protein kinase, catalytic domain IPR002290; Serine/threonine-protein kinase domain IPR008352; MAP kinase, p38 IPR011009; Protein kinase-like domain IPR017442; Serine/threonine-protein kinase-like domain IPR020635; Tyrosine-protein kinase, catalytic domain	Mitogen-activated protein kinase 14
	OYG_10004158	NA	Interferon-induced protein 44-like
	OYG_10004278	IPR001680; WD40 repeat IPR002181; Fibrinogen, alpha/beta/gamma chain, C-terminal globular IPR011046; WD40 repeat-like-containing domain IPR017986; WD40-repeat-containing domain IPR019781; WD40 repeat, subgroup IPR019782; WD40 repeat 2 IPR020472; G-protein beta WD-40 repeat IPR021772; Protein of unknown function DUF3337	WD repeat-containing protein 48
	OYG_10004280	IPR002181; Fibrinogen, alpha/beta/gamma chain, C-terminal globular	Tenascin
	OYG_10004282	IPR002181; Fibrinogen, alpha/beta/gamma chain, C-terminal globular	Angiopoietin-4
	OYG_10004283	IPR002181; Fibrinogen, alpha/beta/gamma chain, C-terminal globular	Tenascin-R
	OYG_10004294	IPR001611; Leucine-rich repeat IPR003591; Leucine-rich repeat, typical subtype	Leucine-rich repeat protein soc-2 homolog
	OYG_10004370	NA	Uncharacterized protein C7orf62
	OYG_10004377	IPR000276; 7TM GPCR, rhodopsin-like IPR000611; Neuropeptide Y receptor IPR017452; GPCR, rhodopsin-like superfamily	Pyroglutamylated RFamide peptide receptor
	OYG_10004382	IPR002181; Fibrinogen, alpha/beta/gamma chain, C-terminal globular	Tenascin-R
	OYG_10004425	IPR002181; Fibrinogen, alpha/beta/gamma chain, C-terminal globular	Angiopoietin-4
	OYG_10004430	IPR013126; Heat shock protein 70	Heat shock 70 kDa protein 12A
	OYG_10004601	IPR000742; Epidermal growth factor-like, type 3 IPR000859; CUB IPR000998; MAM domain IPR008985; Concanavalin A-like lectin/glucanase	MAM domain-containing glycosylphosphatidylinositol anchor protein 1
	OYG_10004651	IPR001073; Complement C1q protein IPR008983; Tumour necrosis factor-like	NA
	OYG_10004704	IPR008197; Whey acidic protein, 4-disulphide core	Translation initiation factor IF-2
	OYG_10004706	IPR000816; Peptidase C15, pyroglutamyl peptidase I IPR016125; Peptidase C15, pyroglutamyl peptidase I-like	Pyroglutamyl-peptidase 1
	OYG_10004791	IPR001304; C-type lectin IPR016187; C-type lectin fold	Collectin-11
	OYG_10004798	IPR020864; Membrane attack complex component/perforin (MACPF) domain	NA
	OYG_10004823	IPR013126; Heat shock protein 70	Heat shock 70 kDa protein 12B
	OYG_10004829	IPR001611; Leucine-rich repeat IPR003591; Leucine-rich repeat, typical subtype	Malignant fibrous histiocytoma-amplified sequence 1 homolog
	OYG_10004830	IPR007087; Zinc finger, C2H2-type IPR015880; Zinc finger, C2H2-like	Krueppel-like factor 11
	OYG_10004831	IPR001810; F-box domain, cyclin-like	F-box/LRR-repeat protein 12
	OYG_10004863	IPR014044; CAP domain	Cysteine-rich secretory protein Mr30
	OYG_10004866	IPR009104; Sea anemone cytolysin	Equinatoxin-5
	OYG_10004907	IPR001073; Complement C1q protein IPR008983; Tumour necrosis factor-like	NA
	OYG_10004908	IPR001073; Complement C1q protein IPR008983; Tumour necrosis factor-like	Cerebellin-1
	OYG_10005029	IPR001073; Complement C1q protein IPR008983; Tumour necrosis factor-like	Caprin-2
	OYG_10005030	IPR001073; Complement C1q protein IPR008983; Tumour necrosis factor-like	NA
	OYG_10005031	IPR001073; Complement C1q protein IPR008983; Tumour necrosis factor-like	Caprin-2
	OYG_10005032	IPR001073; Complement C1q protein IPR008983; Tumour necrosis factor-like	NA
	OYG_10005036	IPR006553; Leucine-rich repeat, cysteine-containing subtype	F-box/LRR-repeat protein 16
	OYG_10005109	IPR006052; Tumour necrosis factor IPR008983; Tumour necrosis factor-like	Tumor necrosis factor ligand superfamily member 14
	OYG_10005110	IPR006052; Tumour necrosis factor IPR008983; Tumour necrosis factor-like	Tumor necrosis factor ligand superfamily member 14
	OYG_10005111	IPR002645; Sulphate transporter/antisigma-factor antagonist STAS IPR011547; Sulphate transporter	Prestin
	OYG_10005258	IPR014830; Glycolipid transfer protein domain	Glycolipid transfer protein
	OYG_10005324	IPR003590; Leucine-rich repeat, ribonuclease inhibitor subtype	Uncharacterized protein C14orf166B homolog
	OYG_10005327	IPR001304; C-type lectin IPR016187; C-type lectin fold	Collectin-12
	OYG_10005376	IPR000742; Epidermal growth factor-like, type 3 IPR006209; EGF IPR006210; Epidermal growth factor-like	NA
	OYG_10005379	IPR001611; Leucine-rich repeat IPR001736; Phospholipase D/Transphosphatidylase IPR003591; Leucine-rich repeat, typical subtype	CDP-diacylglycerol--glycerol-3-phosphate 3-phosphatidyltransferase, mitochondrial
	OYG_10005381	IPR003593; ATPase, AAA+ type, core IPR004273; Dynein heavy chain IPR011704; ATPase, AAA-5 IPR013594; Dynein heavy chain, N-terminal domain-1 IPR013602; Dynein heavy chain, N-terminal domain-2	Dynein beta chain, ciliary
	OYG_10005399	IPR008030; NmrA-like	NmrA-like family domain-containing protein 1
	OYG_10005452	IPR001841; Zinc finger, RING-type IPR003593; ATPase, AAA+ type, core	RING finger protein 213
	OYG_10005453	NA	RING finger protein 213
	OYG_10005508	IPR002925; Dienelactone hydrolase	Putative uncharacterized protein yghX
	OYG_10005518	IPR000418; Ets	DNA-binding protein D-ETS-3
	OYG_10005550	IPR001079; Galectin, carbohydrate recognition domain IPR008985; Concanavalin A-like lectin/glucanase IPR013286; Annexin, type VII	Galectin-4
	OYG_10005574	IPR002181; Fibrinogen, alpha/beta/gamma chain, C-terminal globular	Fibrinogen C domain-containing protein 1
	OYG_10005575	IPR002181; Fibrinogen, alpha/beta/gamma chain, C-terminal globular	Fibrinogen C domain-containing protein 1
	OYG_10005577	IPR002181; Fibrinogen, alpha/beta/gamma chain, C-terminal globular	Fibrinogen C domain-containing protein 1
	OYG_10005592	IPR000301; Tetraspanin, subgroup IPR008952; Tetraspanin, EC2 domain IPR018499; Tetraspanin	NA
	OYG_10005596	IPR001623; Heat shock protein DnaJ, N-terminal IPR007842; HEPN	Sacsin
	OYG_10005641	IPR000157; Toll-Interleukin receptor	NA
	OYG_10005667	IPR002048; Calcium-binding EF-hand IPR018249; EF-HAND 2	Myosin catalytic light chain LC-1, mantle muscle
	OYG_10005710	IPR007855; RNA-dependent RNA polymerase, eukaryotic-type	Probable RNA-dependent RNA polymerase SHL2
	OYG_10005774	IPR002181; Fibrinogen, alpha/beta/gamma chain, C-terminal globular	Angiopoietin-2
	OYG_10005776	IPR003590; Leucine-rich repeat, ribonuclease inhibitor subtype	Leucine-rich repeat-containing protein 16A
	OYG_10005796	IPR001752; Kinesin, motor domain	Kinesin-like protein KIF26A
	OYG_10005862	IPR000203; GPS domain IPR000832; GPCR, family 2, secretin-like IPR001304; C-type lectin IPR002172; LDLR class A repeat IPR016187; C-type lectin fold	Latrophilin-3
	OYG_10005897	IPR000276; 7TM GPCR, rhodopsin-like IPR017452; GPCR, rhodopsin-like superfamily	C3a anaphylatoxin chemotactic receptor
	OYG_10006014	IPR008677; MRVI1	Lymphoid-restricted membrane protein
	OYG_10006085	NA	Protein wech
	OYG_10006109	IPR000315; Zinc finger, B-box IPR001841; Zinc finger, RING-type IPR002083; MATH IPR008974; TRAF-like IPR018957; Zinc finger, C3HC4 RING-type	Tripartite motif-containing protein 56
	OYG_10006149	IPR000315; Zinc finger, B-box IPR000742; Epidermal growth factor-like, type 3 IPR001881; EGF-like calcium-binding	Neurogenic locus notch homolog protein 1
	OYG_10006150	IPR000742; Epidermal growth factor-like, type 3 IPR001491; Thrombomodulin IPR001881; EGF-like calcium-binding IPR006210; Epidermal growth factor-like IPR009030; Growth factor, receptor IPR013091; EGF calcium-binding	Latent-transforming growth factor beta-binding protein 4
	OYG_10006224	IPR019528; Pericentrin/AKAP-450 centrosomal targeting domain	NFX1-type zinc finger-containing protein 1
	OYG_10006226	IPR002181; Fibrinogen, alpha/beta/gamma chain, C-terminal globular	Angiopoietin-4
	OYG_10006267	IPR004365; Nucleic acid binding, OB-fold, tRNA/helicase-type IPR016027; Nucleic acid-binding, OB-fold-like	NA
	OYG_10006312	NA	Coiled-coil domain-containing protein 147
	OYG_10006329	NA	NA
	OYG_10006377	IPR001073; Complement C1q protein IPR008983; Tumour necrosis factor-like	Complement C1q-like protein 4
	OYG_10006424	NA	Coiled-coil domain-containing protein 63
	OYG_10006571	IPR001810; F-box domain, cyclin-like	F-box only protein 47
	OYG_10006653	IPR001012; UBX IPR006553; Leucine-rich repeat, cysteine-containing subtype IPR015940; Ubiquitin-associated/translation elongation factor EF1B, N-terminal, eukaryote	UBX domain-containing protein 1
	OYG_10006662	NA	Laminin subunit alpha-2
	OYG_10006681	IPR002035; von Willebrand factor, type A IPR003410; Hyalin	Collagen alpha-1(XII) chain
	OYG_10006712	IPR018902; Uncharacterised protein family UPF0573/UPF0605	UPF0605 protein FAM166B
	OYG_10006926	IPR006052; Tumour necrosis factor IPR008983; Tumour necrosis factor-like	Tumor necrosis factor ligand superfamily member 14
	OYG_10007173	IPR000436; Sushi/SCR/CCP IPR000742; Epidermal growth factor-like, type 3 IPR000884; Thrombospondin, type 1 repeat IPR001881; EGF-like calcium-binding IPR003410; Hyalin IPR006209; EGF IPR006210; Epidermal growth factor-like IPR009030; Growth factor, receptor IPR011641; Tyrosine-protein kinase ephrin type A/B receptor-like IPR016060; Complement control module	Sushi, von Willebrand factor type A, EGF and pentraxin domain-containing protein 1
	OYG_10007199	IPR001073; Complement C1q protein IPR008983; Tumour necrosis factor-like	EMILIN-2
	OYG_10007235	IPR000276; 7TM GPCR, rhodopsin-like IPR001611; Leucine-rich repeat IPR003591; Leucine-rich repeat, typical subtype IPR017452; GPCR, rhodopsin-like superfamily	G-protein coupled receptor GRL101
	OYG_10007261	IPR000421; Coagulation factor 5/8 type, C-terminal IPR006585; Fucolectin tachylectin-4 pentraxin-1 IPR008979; Galactose-binding domain-like	NA
	OYG_10007364	NA	Protein ALO17
	OYG_10007366	IPR001878; Zinc finger, CCHC-type IPR002159; CD36 antigen IPR005428; Adhesion molecule CD36	Scavenger receptor class B member 1
	OYG_10007573	IPR000242; Protein-tyrosine phosphatase, receptor/non-receptor type IPR000387; Dual-specific/protein-tyrosine phosphatase, conserved region IPR003595; Protein-tyrosine phosphatase, catalytic IPR006210; Epidermal growth factor-like IPR009030; Growth factor, receptor	Multiple epidermal growth factor-like domains 11
	OYG_10007718	IPR001870; B302/SPRY domain IPR003877; SPla/RYanodine receptor SPRY IPR006553; Leucine-rich repeat, cysteine-containing subtype IPR008985; Concanavalin A-like lectin/glucanase IPR013684; Mitochondrial Rho-like IPR018249; EF-HAND 2 IPR018355; SPla/RYanodine receptor subgroup IPR020859; ROC GTPase	Probable serine/threonine-protein kinase pats1
	OYG_10007957	IPR018939; Autophagy-related protein 27	NA
	OYG_10008306	IPR000157; Toll-Interleukin receptor IPR016024; Armadillo-type fold	NA
	OYG_10008470	IPR003010; Nitrilase/cyanide hydratase and apolipoprotein N-acyltransferase	Beta-ureidopropionase
	OYG_10008531	IPR000277; Cys/Met metabolism, pyridoxal phosphate-dependent enzyme IPR015424; Pyridoxal phosphate-dependent transferase, major domain	Cystathionine gamma-lyase
	OYG_10008543	IPR002181; Fibrinogen, alpha/beta/gamma chain, C-terminal globular	Techylectin-5B
	OYG_10009035	IPR001611; Leucine-rich repeat IPR001680; WD40 repeat IPR011046; WD40 repeat-like-containing domain IPR017986; WD40-repeat-containing domain IPR019781; WD40 repeat, subgroup IPR019782; WD40 repeat 2	Leucine-rich repeat and WD repeat-containing protein 1
	OYG_10009083	IPR002181; Fibrinogen, alpha/beta/gamma chain, C-terminal globular	Angiopoietin-2
	OYG_10009097	IPR006052; Tumour necrosis factor IPR008983; Tumour necrosis factor-like	NA
	OYG_10009681	NA	Coiled-coil domain-containing protein 113
	OYG_10009691	IPR001304; C-type lectin IPR016187; C-type lectin fold	NA
	OYG_10009753	IPR001073; Complement C1q protein IPR008983; Tumour necrosis factor-like	Caprin-2
	OYG_10009872	IPR001073; Complement C1q protein IPR008983; Tumour necrosis factor-like	Complement C1q-like protein 4
	OYG_10010197	IPR000315; Zinc finger, B-box	Tripartite motif-containing protein 2
	OYG_10010247	IPR001304; C-type lectin IPR002353; Type II antifreeze protein IPR016187; C-type lectin fold	CD209 antigen
	OYG_10010996	IPR001073; Complement C1q protein IPR008983; Tumour necrosis factor-like	Caprin-2
	OYG_10010998	IPR001073; Complement C1q protein IPR008983; Tumour necrosis factor-like	Caprin-2
	OYG_10011027	IPR001304; C-type lectin IPR016187; C-type lectin fold	Lectin BRA-3
	OYG_10011033	IPR000315; Zinc finger, B-box	Tripartite motif-containing protein 2
	OYG_10011328	IPR002668; Na dependent nucleoside transporter IPR011642; Nucleoside recognition IPR011657; Na dependent nucleoside transporter, C-terminal	Solute carrier family 28 member 3
	OYG_10011483	IPR000157; Toll-Interleukin receptor	NA
	OYG_10011672	IPR001304; C-type lectin IPR016187; C-type lectin fold	Mannose-binding protein A
	OYG_10011673	IPR001304; C-type lectin IPR016187; C-type lectin fold	Perlucin
	OYG_10012042	IPR001008; Metallothionein, family 2, mollusc	Metallothionein
	OYG_10012045	IPR001073; Complement C1q protein IPR008983; Tumour necrosis factor-like	Heavy metal-binding protein HIP
	OYG_10012046	IPR001073; Complement C1q protein IPR008983; Tumour necrosis factor-like	NA
	OYG_10012124	IPR006108; 3-hydroxyacyl-CoA dehydrogenase, C-terminal IPR006176; 3-hydroxyacyl-CoA dehydrogenase, NAD binding IPR008927; 6-phosphogluconate dehydrogenase, C-terminal-like	Lambda-crystallin homolog
	OYG_10012232	IPR001073; Complement C1q protein IPR008983; Tumour necrosis factor-like	Hibernation-associated plasma protein HP-27
	OYG_10012517	IPR000157; Toll-Interleukin receptor	NA
	OYG_10013042	IPR001125; Recoverin IPR002048; Calcium-binding EF-hand IPR018249; EF-HAND 2	EF-hand calcium-binding domain-containing protein 1
	OYG_10013049	IPR001304; C-type lectin IPR016187; C-type lectin fold	Perlucin
	OYG_10013066	IPR001073; Complement C1q protein IPR008983; Tumour necrosis factor-like	Complement C1q tumor necrosis factor-related protein 3
	OYG_10014025	IPR002181; Fibrinogen, alpha/beta/gamma chain, C-terminal globular	Ficolin-2
	OYG_10014035	IPR001315; Caspase Recruitment	Interferon-induced helicase C domain-containing protein 1
	OYG_10014499	IPR002181; Fibrinogen, alpha/beta/gamma chain, C-terminal globular	Tenascin-R
	OYG_10014500	IPR002181; Fibrinogen, alpha/beta/gamma chain, C-terminal globular	Tenascin-R
	OYG_10014567	IPR000276; 7TM GPCR, rhodopsin-like IPR000998; MAM domain IPR001611; Leucine-rich repeat IPR003591; Leucine-rich repeat, typical subtype IPR017452; GPCR, rhodopsin-like superfamily	G-protein coupled receptor GRL101
	OYG_10014619	IPR006616; DM9 repeat	NA
	OYG_10014620	IPR006616; DM9 repeat	Natterin-4
	OYG_10014725	NA	UPF0407 protein C2orf39 homolog
	OYG_10014801	IPR002933; Peptidase M20 IPR011650; Peptidase M20, dimerisation	Aminoacylase-1
	OYG_10015018	IPR011547; Sulphate transporter	Prestin
	OYG_10015230	IPR002478; Pseudouridine synthase/archaeosine transglycosylase IPR002501; Pseudouridine synthase II IPR012960; Dyskerin-like IPR015947; Pseudouridine synthase/archaeosine transglycosylase-like IPR020103; Pseudouridine synthase, catalytic domain	H/ACA ribonucleoprotein complex subunit 4
	OYG_10015346	IPR001073; Complement C1q protein IPR008983; Tumour necrosis factor-like	NA
	OYG_10015527	IPR002093; BRCA2 repeat IPR015187; BRCA2, oligonucleotide/oligosaccharide-binding 1 IPR015188; BRCA2, oligonucleotide/oligosaccharide-binding 3 IPR015205; Tower IPR015252; DNA recombination/repair protein BRCA2, helical domain IPR016027; Nucleic acid-binding, OB-fold-like	Breast cancer type 2 susceptibility protein homolog
	OYG_10015625	IPR001073; Complement C1q protein IPR008983; Tumour necrosis factor-like	NA
	OYG_10016035	IPR001611; Leucine-rich repeat IPR003591; Leucine-rich repeat, typical subtype	Immunoglobulin superfamily member 10
	OYG_10016318	IPR001073; Complement C1q protein IPR008983; Tumour necrosis factor-like	Complement C1q tumor necrosis factor-related protein 3
	OYG_10016350	IPR001073; Complement C1q protein IPR008983; Tumour necrosis factor-like	Complement C1q-like protein 2
	OYG_10016362	IPR001073; Complement C1q protein IPR008983; Tumour necrosis factor-like	EMILIN-2
	OYG_10016424	IPR001073; Complement C1q protein IPR008983; Tumour necrosis factor-like	Collagen alpha-2(VIII) chain
	OYG_10016480	IPR006029; Neurotransmitter-gated ion-channel transmembrane domain IPR006201; Neurotransmitter-gated ion-channel IPR006202; Neurotransmitter-gated ion-channel ligand-binding	Neuronal acetylcholine receptor subunit beta-3
	OYG_10016512	IPR000157; Toll-Interleukin receptor	Toll-like receptor 4
	OYG_10016586	IPR002181; Fibrinogen, alpha/beta/gamma chain, C-terminal globular	NA
	OYG_10016708	IPR000742; Epidermal growth factor-like, type 3 IPR001774; Delta/Serrate/lag-2 (DSL) protein IPR001881; EGF-like calcium-binding IPR006209; EGF IPR006210; Epidermal growth factor-like IPR013091; EGF calcium-binding	Fibropellin-1
	OYG_10016718	IPR000668; Peptidase C1A, papain C-terminal IPR013201; Proteinase inhibitor I29, cathepsin propeptide	Cathepsin L1
	OYG_10017670	IPR000157; Toll-Interleukin receptor IPR000483; Cysteine-rich flanking region, C-terminal domain IPR003591; Leucine-rich repeat, typical subtype IPR004075; Interleukin-1 receptor, type I/Toll precursor	Toll-like receptor 13
	OYG_10017753	IPR004000; Actin-like	Actin
	OYG_10018026	IPR002181; Fibrinogen, alpha/beta/gamma chain, C-terminal globular	Angiopoietin-1
	OYG_10018436	IPR002999; Tudor domain IPR008191; Maternal tudor protein	Tudor domain-containing protein 7
	OYG_10018443	IPR002181; Fibrinogen, alpha/beta/gamma chain, C-terminal globular	Tenascin
	OYG_10018554	IPR001304; C-type lectin IPR011705; BTB/Kelch-associated IPR016187; C-type lectin fold	Aggrecan core protein
	OYG_10018556	IPR001304; C-type lectin IPR016187; C-type lectin fold	Aggrecan core protein
	OYG_10018920	NA	Leucine-rich repeat-containing protein 51
	OYG_10019155	IPR003594; ATPase-like, ATP-binding domain IPR007842; HEPN	Sacsin
	OYG_10019212	IPR001304; C-type lectin IPR002353; Type II antifreeze protein IPR016187; C-type lectin fold	C-type lectin domain family 10 member A
	OYG_10019718	IPR002893; Zinc finger, MYND-type	NA
	OYG_10020495	IPR000276; 7TM GPCR, rhodopsin-like IPR001611; Leucine-rich repeat IPR002131; Glycoprotein hormone receptor IPR017452; GPCR, rhodopsin-like superfamily	Thyrotropin receptor
	OYG_10021028	IPR014782; Peptidase M1, membrane alanine aminopeptidase, N-terminal	Aminopeptidase N
	OYG_10021047	IPR001073; Complement C1q protein IPR008983; Tumour necrosis factor-like	Heavy metal-binding protein HIP
	OYG_10021048	IPR001073; Complement C1q protein IPR008983; Tumour necrosis factor-like	Complement C1q-like protein 4
	OYG_10021126	IPR019579; Uncharacterised protein family UPF0564	Protein FAM161A
	OYG_10021480	IPR022413; ATP:guanido phosphotransferase, N-terminal IPR022414; ATP:guanido phosphotransferase, catalytic domain	Arginine kinase
	OYG_10021488	IPR001073; Complement C1q protein IPR008983; Tumour necrosis factor-like	Complement C1q-like protein 4
	OYG_10022004	IPR002035; von Willebrand factor, type A	Collagen alpha-6(VI) chain
	OYG_10022012	IPR021454; Protein of unknown function DUF3105	NA
	OYG_10022340	IPR002181; Fibrinogen, alpha/beta/gamma chain, C-terminal globular	Ficolin-1
	OYG_10022591	IPR001073; Complement C1q protein IPR008983; Tumour necrosis factor-like	Complement C1q tumor necrosis factor-related protein 3
	OYG_10022593	IPR000834; Peptidase M14, carboxypeptidase A IPR002557; Chitin binding domain	Carboxypeptidase B
	OYG_10022618	IPR000860; Tetrapyrrole biosynthesis, hydroxymethylbilane synthase IPR022417; Porphobilinogen deaminase, N-terminal IPR022418; Porphobilinogen deaminase, C-terminal domain	Porphobilinogen deaminase
	OYG_10023013	IPR001073; Complement C1q protein IPR008983; Tumour necrosis factor-like	Complement C1q tumor necrosis factor-related protein 3
	OYG_10023121	IPR000210; BTB/POZ-like IPR006652; Kelch repeat type 1 IPR011333; BTB/POZ fold IPR011705; BTB/Kelch-associated IPR013069; BTB/POZ	Kelch-like protein 3
	OYG_10023202	IPR000742; Epidermal growth factor-like, type 3 IPR001073; Complement C1q protein IPR001846; von Willebrand factor, type D domain IPR001881; EGF-like calcium-binding IPR006210; Epidermal growth factor-like IPR008983; Tumour necrosis factor-like IPR009030; Growth factor, receptor IPR013091; EGF calcium-binding	Latent-transforming growth factor beta-binding protein 4
	OYG_10023710	IPR000922; D-galactoside/L-rhamnose binding SUEL lectin domain	Rhamnose-binding lectin
	OYG_10023970	IPR001304; C-type lectin IPR016187; C-type lectin fold	NA
	OYG_10024070	IPR006571; TLDc	Interferon-induced protein 44-like
	OYG_10024455	IPR008597; Destabilase	Lysozyme
	OYG_10024456	IPR006029; Neurotransmitter-gated ion-channel transmembrane domain IPR006201; Neurotransmitter-gated ion-channel IPR006202; Neurotransmitter-gated ion-channel ligand-binding	Neuronal acetylcholine receptor subunit alpha-3
	OYG_10024876	IPR001304; C-type lectin IPR016187; C-type lectin fold	NA
	OYG_10025120	IPR001073; Complement C1q protein IPR008983; Tumour necrosis factor-like	NA
	OYG_10025655	IPR001611; Leucine-rich repeat IPR002048; Calcium-binding EF-hand IPR003590; Leucine-rich repeat, ribonuclease inhibitor subtype IPR018249; EF-HAND 2	Uncharacterized protein C14orf166B homolog
	OYG_10026201	IPR002181; Fibrinogen, alpha/beta/gamma chain, C-terminal globular	Ficolin-2
	OYG_10026436	IPR001299; Ependymin	NA
	OYG_10026716	IPR001073; Complement C1q protein IPR008983; Tumour necrosis factor-like	Complement C1q-like protein 4
	OYG_10026873	IPR001073; Complement C1q protein IPR008983; Tumour necrosis factor-like	Complement C1q-like protein 4
	OYG_10026881	IPR002181; Fibrinogen, alpha/beta/gamma chain, C-terminal globular	Tenascin-R
	OYG_10026882	IPR002181; Fibrinogen, alpha/beta/gamma chain, C-terminal globular	Fibrinogen C domain-containing protein 1
	OYG_10026883	IPR002181; Fibrinogen, alpha/beta/gamma chain, C-terminal globular	Fibrinogen C domain-containing protein 1
	OYG_10026912	IPR001304; C-type lectin IPR002353; Type II antifreeze protein IPR016187; C-type lectin fold	Low affinity immunoglobulin epsilon Fc receptor
	OYG_10026933	IPR002007; Haem peroxidase, animal IPR010255; Haem peroxidase IPR019791; Haem peroxidase, animal, subgroup	Eosinophil peroxidase
	OYG_10027513	IPR000157; Toll-Interleukin receptor IPR000483; Cysteine-rich flanking region, C-terminal domain IPR001611; Leucine-rich repeat IPR003591; Leucine-rich repeat, typical subtype IPR004075; Interleukin-1 receptor, type I/Toll precursor	Toll-like receptor 3
	OYG_10027555	IPR001304; C-type lectin IPR016187; C-type lectin fold	Tetranectin
	OYG_10027625	IPR001304; C-type lectin IPR016187; C-type lectin fold	Macrophage mannose receptor 1
	OYG_10027689	IPR000757; Glycoside hydrolase, family 16 IPR008985; Concanavalin A-like lectin/glucanase	Beta-1,3-glucan-binding protein 1
	OYG_10027739	IPR001304; C-type lectin IPR016187; C-type lectin fold	C-type lectin isoform 1
	OYG_10028269	NA	NA
	OYG_10028445	IPR013819; Lipoxygenase, C-terminal	Arachidonate 15-lipoxygenase type II
	OYG_10028856	IPR002318; Alanyl-tRNA synthetase, class IIc IPR003156; Phosphoesterase, DHHA1 IPR012947; Threonyl/alanyl tRNA synthetase, SAD IPR018162; Alanyl-tRNA synthetase, class IIc, anti-codon-binding domain IPR018163; Threonyl/alanyl tRNA synthetase, class II-like, putative editing domain IPR018164; Alanyl-tRNA synthetase, class IIc, N-terminal IPR018165; Alanyl-tRNA synthetase, class IIc, core domain	Alanyl-tRNA synthetase, cytoplasmic
shared by larvae and adults	OYG_10000736	IPR002181; Fibrinogen, alpha/beta/gamma chain, C-terminal globular	Fibrinogen C domain-containing protein 1
	OYG_10000790	IPR000719; Protein kinase, catalytic domain IPR001245; Serine-threonine/tyrosine-protein kinase IPR011009; Protein kinase-like domain IPR020635; Tyrosine-protein kinase, catalytic domain	Hepatocyte growth factor receptor
	OYG_10000867	NA	Testis, prostate and placenta-expressed protein
	OYG_10001346	IPR000157; Toll-Interleukin receptor	Toll-like receptor 13
	OYG_10001373	NA	Inhibitor of nuclear factor kappa-B kinase subunit alpha
	OYG_10001511	IPR001190; Speract/scavenger receptor IPR017448; Speract/scavenger receptor-related	Scavenger receptor cysteine-rich type 1 protein M130
	OYG_10001805	IPR001073; Complement C1q protein IPR008983; Tumour necrosis factor-like	NA
	OYG_10001849	IPR000323; Copper type II, ascorbate-dependent monooxygenase, N-terminal IPR008977; PHM/PNGase F-fold domain	Dopamine beta-hydroxylase
	OYG_10001861	IPR001073; Complement C1q protein IPR008983; Tumour necrosis factor-like	NA
	OYG_10001869	IPR006571; TLDc	Interferon-induced protein 44-like
	OYG_10001933	NA	Protein FAM183A
	OYG_10002099	IPR002181; Fibrinogen, alpha/beta/gamma chain, C-terminal globular	Ficolin-2
	OYG_10002166	IPR000782; FAS1 domain	Transforming growth factor-beta-induced protein ig-h3
	OYG_10002314	IPR002198; Short-chain dehydrogenase/reductase SDR IPR002347; Glucose/ribitol dehydrogenase	Short chain dehydrogenase/reductase family 9C member 7
	OYG_10002359	NA	NA
	OYG_10002361	IPR001129; Membrane-associated, eicosanoid/glutathione metabolism (MAPEG) protein	Microsomal glutathione S-transferase 1
	OYG_10002369	IPR002181; Fibrinogen, alpha/beta/gamma chain, C-terminal globular	Angiopoietin-related protein 6
	OYG_10002435	IPR000889; Glutathione peroxidase IPR012336; Thioredoxin-like fold	Glutathione peroxidase 7
	OYG_10002465	IPR001611; Leucine-rich repeat IPR003591; Leucine-rich repeat, typical subtype	Leucine-rich repeat-containing protein 27
	OYG_10002494	IPR006210; Epidermal growth factor-like IPR009030; Growth factor, receptor	Tenascin-X
	OYG_10002589	IPR010300; Cysteine dioxygenase type I IPR011051; Cupin, RmlC-type	Cysteine dioxygenase type 1
	OYG_10002610	IPR000001; Kringle IPR013806; Kringle-like fold	Plasminogen
	OYG_10002617	IPR013027; FAD-dependent pyridine nucleotide-disulphide oxidoreductase	Sulfide:quinone oxidoreductase, mitochondrial
	OYG_10002652	IPR001128; Cytochrome P450 IPR002401; Cytochrome P450, E-class, group I	Steroid 17-alpha-hydroxylase/17,20 lyase
	OYG_10002654	NA	Uncharacterized protein C3orf38 homolog
	OYG_10002656	IPR000157; Toll-Interleukin receptor IPR000483; Cysteine-rich flanking region, C-terminal domain IPR001611; Leucine-rich repeat IPR004075; Interleukin-1 receptor, type I/Toll precursor	Protein toll
	OYG_10002660	IPR002181; Fibrinogen, alpha/beta/gamma chain, C-terminal globular	Tenascin-R
	OYG_10002664	IPR001611; Leucine-rich repeat IPR003591; Leucine-rich repeat, typical subtype	Peptidylprolyl isomerase-like 5
	OYG_10002665	IPR002181; Fibrinogen, alpha/beta/gamma chain, C-terminal globular	Tenascin-R
	OYG_10002673	IPR000315; Zinc finger, B-box	Tripartite motif-containing protein 45
	OYG_10002674	IPR001073; Complement C1q protein IPR008983; Tumour necrosis factor-like	Complement C1q-like protein 3
	OYG_10002721	IPR001073; Complement C1q protein IPR008983; Tumour necrosis factor-like	Hibernation-associated plasma protein HP-27
	OYG_10002724	IPR013094; Alpha/beta hydrolase fold-3	Arylacetamide deacetylase
	OYG_10002835	IPR001810; F-box domain, cyclin-like IPR006553; Leucine-rich repeat, cysteine-containing subtype IPR022364; F-box domain, Skp2-like	F-box/LRR-repeat protein 14
	OYG_10002837	IPR006703; AIG1	GTPase IMAP family member 4
	OYG_10002838	IPR001304; C-type lectin IPR016187; C-type lectin fold	NA
	OYG_10002839	IPR001304; C-type lectin IPR002353; Type II antifreeze protein IPR016187; C-type lectin fold	Perlucin
	OYG_10002845	IPR010418; ECSIT	Evolutionarily conserved signaling intermediate in Toll pathway, mitochondrial
	OYG_10002900	NA	Coiled-coil domain-containing protein 65
	OYG_10002904	NA	NA
	OYG_10002906	IPR001073; Complement C1q protein IPR008983; Tumour necrosis factor-like	Caprin-2
	OYG_10002907	IPR001073; Complement C1q protein IPR008983; Tumour necrosis factor-like	Caprin-2
	OYG_10002963	IPR001304; C-type lectin IPR016187; C-type lectin fold	Macrophage asialoglycoprotein-binding protein 1
	OYG_10002966	IPR001073; Complement C1q protein IPR008983; Tumour necrosis factor-like	NA
	OYG_10002997	IPR013658; SMP-30/Gluconolaconase/LRE-like region	Tripartite motif-containing protein 3
	OYG_10003000	IPR001073; Complement C1q protein IPR008983; Tumour necrosis factor-like	Complement C1q-like protein 2
	OYG_10003117	IPR001828; Extracellular ligand-binding receptor	Atrial natriuretic peptide clearance receptor
	OYG_10003166	IPR001073; Complement C1q protein IPR008983; Tumour necrosis factor-like	Complement C1q-like protein 4
	OYG_10003256	IPR001304; C-type lectin IPR016187; C-type lectin fold	NA
	OYG_10003289	IPR002035; von Willebrand factor, type A	Collagen alpha-6(VI) chain
	OYG_10003300	NA	NFX1-type zinc finger-containing protein 1
	OYG_10003301	NA	NFX1-type zinc finger-containing protein 1
	OYG_10003335	NA	NA
	OYG_10003367	IPR000209; Peptidase S8/S53, subtilisin/kexin/sedolisin IPR001073; Complement C1q protein IPR002884; Proprotein convertase, P IPR008979; Galactose-binding domain-like IPR008983; Tumour necrosis factor-like	Neuroendocrine convertase 1
	OYG_10003369	IPR001905; Ammonium transporter IPR002229; Blood group Rhesus C/E/D polypeptide	Ammonium transporter Rh type B-A
	OYG_10003440	IPR001304; C-type lectin IPR016187; C-type lectin fold	NA
	OYG_10003522	IPR008011; Complex 1 LYR protein	LYR motif-containing protein 5A
	OYG_10003553	IPR003582; Metridin-like ShK toxin	NA
	OYG_10003556	IPR001611; Leucine-rich repeat IPR003591; Leucine-rich repeat, typical subtype IPR003603; U2A'/phosphoprotein 32 family A, C-terminal	Protein phosphatase 1 regulatory subunit 7
	OYG_10003648	NA	NA
	OYG_10003650	IPR000276; 7TM GPCR, rhodopsin-like IPR017452; GPCR, rhodopsin-like superfamily	Cholecystokinin receptor
	OYG_10003656	IPR001304; C-type lectin IPR016187; C-type lectin fold	NA
	OYG_10003698	NA	Dihydrodipicolinate synthase-like, mitochondrial
	OYG_10003723	NA	F-box only protein 43
	OYG_10003785	NA	NA
	OYG_10003801	IPR003598; Immunoglobulin subtype 2 IPR003599; Immunoglobulin subtype IPR007110; Immunoglobulin-like IPR013098; Immunoglobulin I-set	NA
	OYG_10003808	IPR001631; DNA topoisomerase I, C-terminal IPR011010; DNA breaking-rejoining enzyme, catalytic core IPR013499; DNA topoisomerase I, C-terminal, eukaryotic-type IPR013500; DNA topoisomerase I, catalytic core, eukaryotic-type	DNA topoisomerase 1
	OYG_10003929	NA	Long-chain fatty acid transport protein 4
	OYG_10003957	IPR001073; Complement C1q protein IPR008983; Tumour necrosis factor-like	Heavy metal-binding protein HIP
	OYG_10003979	NA	Brorin
	OYG_10004007	IPR002557; Chitin binding domain	IgGFc-binding protein
	OYG_10004024	NA	NA
	OYG_10004043	IPR002181; Fibrinogen, alpha/beta/gamma chain, C-terminal globular	Microfibril-associated glycoprotein 4
	OYG_10004067	IPR006116; 2-5-oligoadenylate synthetase, N-terminal IPR018952; 2'-5'-oligoadenylate synthetase 1, domain 2/C-terminal	2'-5'-oligoadenylate synthetase 3
	OYG_10004069	IPR000157; Toll-Interleukin receptor IPR003609; Apple-like	Transmembrane protein 173
	OYG_10004092	IPR001424; Superoxide dismutase, copper/zinc binding	Extracellular superoxide dismutase [Cu-Zn]
	OYG_10004094	NA	NA
	OYG_10004116	IPR000884; Thrombospondin, type 1 repeat IPR003582; Metridin-like ShK toxin	NA
	OYG_10004133	IPR001073; Complement C1q protein IPR008983; Tumour necrosis factor-like	Complement C1q-like protein 4
	OYG_10004134	IPR001073; Complement C1q protein IPR008983; Tumour necrosis factor-like	Complement C1q-like protein 4
	OYG_10004135	IPR001073; Complement C1q protein IPR008983; Tumour necrosis factor-like	Complement C1q-like protein 2
	OYG_10004164	IPR002068; Heat shock protein Hsp20 IPR008978; HSP20-like chaperone	Stress-induced protein 1
	OYG_10004166	IPR002068; Heat shock protein Hsp20 IPR008978; HSP20-like chaperone	Stress-induced protein 1
	OYG_10004177	IPR001073; Complement C1q protein IPR008983; Tumour necrosis factor-like IPR013017; NHL repeat, subgroup	Caprin-2
	OYG_10004183	IPR000845; Nucleoside phosphorylase domain	Purine nucleoside phosphorylase
	OYG_10004231	IPR001134; Netrin domain IPR001820; Proteinase inhibitor I35, tissue inhibitor of metalloproteinase IPR008993; Tissue inhibitor of metalloproteinases-like, OB-fold	NA
	OYG_10004252	IPR002110; Ankyrin repeat IPR020683; Ankyrin repeat-containing domain	Ankyrin-1
	OYG_10004315	IPR000782; FAS1 domain	Transforming growth factor-beta-induced protein ig-h3
	OYG_10004319	IPR001258; NHL repeat IPR013017; NHL repeat, subgroup	Tripartite motif-containing protein 2
	OYG_10004322	NA	NA
	OYG_10004331	IPR012858; Dendritic cell-specific transmembrane protein-like	DC-STAMP domain-containing protein 2
	OYG_10004381	IPR002181; Fibrinogen, alpha/beta/gamma chain, C-terminal globular	Ficolin-1
	OYG_10004625	IPR001073; Complement C1q protein IPR008983; Tumour necrosis factor-like	Complement C1q-like protein 4
	OYG_10004654	IPR000719; Protein kinase, catalytic domain IPR002290; Serine/threonine-protein kinase domain IPR011009; Protein kinase-like domain IPR017442; Serine/threonine-protein kinase-like domain IPR020635; Tyrosine-protein kinase, catalytic domain	Serine/threonine-protein kinase TBK1
	OYG_10004656	IPR000719; Protein kinase, catalytic domain IPR001965; Zinc finger, PHD-type IPR002290; Serine/threonine-protein kinase domain IPR006565; Bromodomain transcription factor IPR009072; Histone-fold IPR011009; Protein kinase-like domain IPR011011; Zinc finger, FYVE/PHD-type IPR017442; Serine/threonine-protein kinase-like domain IPR017956; AT hook, DNA-binding motif IPR019787; Zinc finger, PHD-finger …	Serine/threonine-protein kinase TBK1
	OYG_10004692	IPR012896; Integrin beta subunit, tail	NA
	OYG_10004761	IPR006652; Kelch repeat type 1	Kelch-like protein 3
	OYG_10004770	IPR000301; Tetraspanin, subgroup IPR001478; PDZ/DHR/GLGF IPR008952; Tetraspanin, EC2 domain IPR018499; Tetraspanin	Tetraspanin-11
	OYG_10004771	IPR006602; Uncharacterised protein domain DM10 IPR010554; Protein of unknown function DUF1126 IPR018249; EF-HAND 2	EF-hand domain-containing protein 1
	OYG_10004824	IPR013126; Heat shock protein 70	Heat shock 70 kDa protein 12B
	OYG_10004826	IPR000742; Epidermal growth factor-like, type 3 IPR001599; Alpha-2-macroglobulin IPR008930; Terpenoid cylases/protein prenyltransferase alpha-alpha toroid IPR009048; Alpha-macroglobulin, receptor-binding IPR011626; A-macroglobulin complement component	CD109 antigen
	OYG_10004827	IPR010788; Violaxanthin de-epoxidase IPR011038; Calycin-like	Violaxanthin de-epoxidase, chloroplastic
	OYG_10004828	IPR001304; C-type lectin IPR016187; C-type lectin fold	Oncoprotein-induced transcript 3 protein
	OYG_10004837	IPR002110; Ankyrin repeat IPR020683; Ankyrin repeat-containing domain	Nuclear factor NF-kappa-B p105 subunit
	OYG_10004868	IPR000175; Sodium:neurotransmitter symporter	Sodium- and chloride-dependent glycine transporter 1
	OYG_10004879	IPR000421; Coagulation factor 5/8 type, C-terminal IPR000742; Epidermal growth factor-like, type 3 IPR006585; Fucolectin tachylectin-4 pentraxin-1 IPR008979; Galactose-binding domain-like	Fucolectin
	OYG_10004922	IPR010345; Interleukin-17, metazoa	NA
	OYG_10004930	IPR000778; Cytochrome b245, heavy chain IPR002048; Calcium-binding EF-hand IPR013112; FAD-binding 8 IPR013130; Flavoprotein transmembrane component IPR017927; Ferredoxin reductase-type FAD-binding domain IPR017938; Riboflavin synthase-like beta-barrel IPR018249; EF-HAND 2	NADPH oxidase 5
	OYG_10005018	IPR000742; Epidermal growth factor-like, type 3 IPR001190; Speract/scavenger receptor IPR001507; Endoglin/CD105 antigen IPR006209; EGF IPR006210; Epidermal growth factor-like IPR017448; Speract/scavenger receptor-related	Deleted in malignant brain tumors 1 protein
	OYG_10005019	IPR016187; C-type lectin fold	NA
	OYG_10005021	IPR000719; Protein kinase, catalytic domain IPR002290; Serine/threonine-protein kinase domain IPR011009; Protein kinase-like domain IPR017442; Serine/threonine-protein kinase-like domain	Serine/threonine-protein kinase haspin
	OYG_10005022	IPR002198; Short-chain dehydrogenase/reductase SDR IPR002347; Glucose/ribitol dehydrogenase	Uncharacterized oxidoreductase C663.09c
	OYG_10005080	IPR004031; PMP-22/EMP/MP20/Claudin	Peripheral myelin protein 22
	OYG_10005097	IPR002223; Proteinase inhibitor I2, Kunitz metazoa IPR008197; Whey acidic protein, 4-disulphide core IPR012336; Thioredoxin-like fold	Eppin
	OYG_10005100	IPR001304; C-type lectin IPR016187; C-type lectin fold	Aggrecan core protein
	OYG_10005133	IPR001346; Interferon regulatory factor IPR007087; Zinc finger, C2H2-type IPR015880; Zinc finger, C2H2-like	Interferon regulatory factor 2
	OYG_10005135	IPR001073; Complement C1q protein IPR008983; Tumour necrosis factor-like	Complement C1q-like protein 4
	OYG_10005141	IPR001304; C-type lectin IPR003990; Pancreatitis-associated protein IPR016187; C-type lectin fold	Collectin-12
	OYG_10005170	IPR002181; Fibrinogen, alpha/beta/gamma chain, C-terminal globular	Angiopoietin-4
	OYG_10005174	IPR009836; Protein of unknown function DUF1399	NA
	OYG_10005177	IPR001304; C-type lectin IPR016187; C-type lectin fold	NA
	OYG_10005194	IPR000157; Toll-Interleukin receptor IPR001611; Leucine-rich repeat IPR003591; Leucine-rich repeat, typical subtype	Toll-like receptor 13
	OYG_10005220	IPR001073; Complement C1q protein IPR008983; Tumour necrosis factor-like	NA
	OYG_10005221	IPR001073; Complement C1q protein IPR008983; Tumour necrosis factor-like	NA
	OYG_10005238	IPR008653; Immediate early response	Immediate early response gene 5 protein
	OYG_10005245	IPR000595; Cyclic nucleotide-binding domain IPR002373; cAMP/cGMP-dependent protein kinase IPR018490; Cyclic nucleotide-binding-like	NA
	OYG_10005254	IPR002312; Aspartyl/Asparaginyl-tRNA synthetase, class IIb IPR004364; Aminoacyl-tRNA synthetase, class II (D/K/N) IPR004365; Nucleic acid binding, OB-fold, tRNA/helicase-type IPR006195; Aminoacyl-tRNA synthetase, class II IPR016027; Nucleic acid-binding, OB-fold-like	Asparaginyl-tRNA synthetase, cytoplasmic
	OYG_10005366	IPR000040; Acute myeloid leukemia 1 protein (AML 1)/Runt IPR008967; p53-like transcription factor, DNA-binding IPR013524; Acute myeloid leukemia 1 (AML 1)/Runt	Runt-related transcription factor 1
	OYG_10005389	IPR000276; 7TM GPCR, rhodopsin-like IPR000611; Neuropeptide Y receptor IPR017452; GPCR, rhodopsin-like superfamily	Pyroglutamylated RFamide peptide receptor
	OYG_10005391	IPR006461; Uncharacterised protein family Cys-rich	PLAC8-like protein 1
	OYG_10005392	IPR001370; Baculoviral inhibition of apoptosis protein repeat IPR001841; Zinc finger, RING-type	Baculoviral IAP repeat-containing protein 3
	OYG_10005410	IPR001327; Pyridine nucleotide-disulphide oxidoreductase, NAD-binding region IPR013027; FAD-dependent pyridine nucleotide-disulphide oxidoreductase IPR016156; FAD/NAD-linked reductase, dimerisation	Apoptosis-inducing factor 1, mitochondrial
	OYG_10005421	IPR000157; Toll-Interleukin receptor IPR000483; Cysteine-rich flanking region, C-terminal domain IPR001611; Leucine-rich repeat IPR003591; Leucine-rich repeat, typical subtype IPR004075; Interleukin-1 receptor, type I/Toll precursor IPR008197; Whey acidic protein, 4-disulphide core	Protein toll
	OYG_10005424	IPR001466; Beta-lactamase-related IPR012338; Beta-lactamase-type transpeptidase fold	Protein fmtA
	OYG_10005425	IPR001466; Beta-lactamase-related IPR012338; Beta-lactamase-type transpeptidase fold	NA
	OYG_10005427	IPR001073; Complement C1q protein IPR008983; Tumour necrosis factor-like	NA
	OYG_10005428	IPR001073; Complement C1q protein IPR008983; Tumour necrosis factor-like	Complement C1q-like protein 4
	OYG_10005429	IPR001073; Complement C1q protein IPR008983; Tumour necrosis factor-like	EMILIN-1
	OYG_10005430	IPR000884; Thrombospondin, type 1 repeat	A disintegrin and metalloproteinase with thrombospondin motifs 13
	OYG_10005470	IPR000889; Glutathione peroxidase IPR012336; Thioredoxin-like fold	Glutathione peroxidase
	OYG_10005529	IPR000421; Coagulation factor 5/8 type, C-terminal IPR000859; CUB IPR001304; C-type lectin IPR006585; Fucolectin tachylectin-4 pentraxin-1 IPR008979; Galactose-binding domain-like IPR016187; C-type lectin fold	NA
	OYG_10005567	IPR001304; C-type lectin IPR003014; PAN-1 domain IPR003609; Apple-like IPR016187; C-type lectin fold	Aggrecan core protein
	OYG_10005586	IPR003590; Leucine-rich repeat, ribonuclease inhibitor subtype IPR011029; DEATH-like	NACHT, LRR and PYD domains-containing protein 5
	OYG_10005731	IPR005018; DOMON domain IPR006593; Cytochrome b561/ferric reductase transmembrane	Putative ferric-chelate reductase 1
	OYG_10005871	IPR000626; Ubiquitin IPR019955; Ubiquitin supergroup	NA
	OYG_10005872	IPR001394; Peptidase C19, ubiquitin carboxyl-terminal hydrolase 2	Ubiquitin carboxyl-terminal hydrolase 16
	OYG_10005883	IPR000157; Toll-Interleukin receptor	Toll-like receptor 6
	OYG_10005888	IPR002300; Aminoacyl-tRNA synthetase, class Ia IPR002303; Valyl-tRNA synthetase IPR009008; Valyl/Leucyl/Isoleucyl-tRNA synthetase, class Ia, editing domain IPR009080; Aminoacyl-tRNA synthetase, class 1a, anticodon-binding IPR013155; Valyl/Leucyl/Isoleucyl-tRNA synthetase, class I, anticodon-binding	Valyl-tRNA synthetase
	OYG_10005960	IPR001436; Alpha crystallin/Heat shock protein IPR002068; Heat shock protein Hsp20 IPR008978; HSP20-like chaperone	Heat shock protein 26
	OYG_10005961	IPR007305; Vesicle transport protein, Got1/SFT2-like	Vesicle transport protein GOT1B
	OYG_10005982	IPR006652; Kelch repeat type 1	Alpha-scruin
	OYG_10006025	IPR000197; Zinc finger, TAZ-type IPR003101; Coactivator CBP, KIX	Histone acetyltransferase p300
	OYG_10006051	IPR004302; Chitin-binding, domain 3	NA
	OYG_10006133	IPR000742; Epidermal growth factor-like, type 3 IPR001881; EGF-like calcium-binding IPR006210; Epidermal growth factor-like IPR013091; EGF calcium-binding	Fibrillin-3
	OYG_10006196	IPR000504; RNA recognition motif domain IPR002589; Appr-1-p processing IPR012317; Poly(ADP-ribose) polymerase, catalytic domain	Poly [ADP-ribose] polymerase 14
	OYG_10006232	NA	NFX1-type zinc finger-containing protein 1
	OYG_10006236	IPR001846; von Willebrand factor, type D domain	Apolipophorins
	OYG_10006254	IPR006029; Neurotransmitter-gated ion-channel transmembrane domain IPR006201; Neurotransmitter-gated ion-channel IPR006202; Neurotransmitter-gated ion-channel ligand-binding	Acetylcholine receptor subunit delta
	OYG_10006343	IPR000146; Fructose-1,6-bisphosphatase class 1/Sedoheputulose-1,7-bisphosphatase	Fructose-1,6-bisphosphatase 1
	OYG_10006359	IPR013126; Heat shock protein 70	Heat shock 70 kDa protein 12B
	OYG_10006367	IPR001304; C-type lectin IPR016187; C-type lectin fold	Perlucin
	OYG_10006368	IPR001304; C-type lectin IPR002353; Type II antifreeze protein IPR016187; C-type lectin fold	Collectin-12
	OYG_10006371	IPR001190; Speract/scavenger receptor IPR017448; Speract/scavenger receptor-related	HHIP-like protein 1
	OYG_10006380	IPR001073; Complement C1q protein IPR008983; Tumour necrosis factor-like	NA
	OYG_10006412	IPR001650; Helicase, C-terminal IPR011545; DNA/RNA helicase, DEAD/DEAH box type, N-terminal IPR014001; DEAD-like helicase, N-terminal IPR014014; RNA helicase, DEAD-box type, Q motif IPR014021; Helicase, superfamily 1/2, ATP-binding domain	Spliceosome RNA helicase BAT1
	OYG_10006414	IPR016187; C-type lectin fold	NA
	OYG_10006430	IPR014782; Peptidase M1, membrane alanine aminopeptidase, N-terminal	Aminopeptidase N
	OYG_10006439	IPR000157; Toll-Interleukin receptor	Transmembrane protein 173
	OYG_10006476	NA	RING finger protein 213
	OYG_10006639	IPR001283; Allergen V5/Tpx-1-related IPR002909; Cell surface receptor IPT/TIG IPR011050; Pectin lyase fold/virulence factor IPR011658; PA14 IPR014044; CAP domain IPR014756; Immunoglobulin E-set	Fibrocystin-L
	OYG_10006640	IPR001952; Alkaline phosphatase IPR017850; Alkaline-phosphatase-like, core domain	Alkaline phosphatase, tissue-nonspecific isozyme
	OYG_10006691	IPR002035; von Willebrand factor, type A	Collagen alpha-6(VI) chain
	OYG_10006693	IPR001190; Speract/scavenger receptor IPR017448; Speract/scavenger receptor-related	Neurotrypsin
	OYG_10006708	IPR002498; Phosphatidylinositol-4-phosphate 5-kinase, core IPR016034; Phosphatidylinositol-4-phosphate 5-kinase, core, subgroup	Phosphatidylinositol-4-phosphate 5-kinase-like protein 1
	OYG_10006725	IPR001073; Complement C1q protein IPR008983; Tumour necrosis factor-like	Complement C1q-like protein 4
	OYG_10006803	NA	Uncharacterized protein LOC340228
	OYG_10006869	NA	NA
	OYG_10006889	IPR001368; TNFR/CD27/30/40/95 cysteine-rich region IPR002557; Chitin binding domain IPR009030; Growth factor, receptor	Myosin-10
	OYG_10006899	IPR006210; Epidermal growth factor-like IPR008979; Galactose-binding domain-like IPR009030; Growth factor, receptor	Multiple epidermal growth factor-like domains 10
	OYG_10006978	IPR001715; Calponin homology domain IPR008962; PapD-like	Uncharacterized protein CXorf22
	OYG_10007004	IPR001024; Lipoxygenase, LH2 IPR008976; Lipase/lipooxygenase, PLAT/LH2	Lipoxygenase homology domain-containing protein 1
	OYG_10007098	IPR000172; Glucose-methanol-choline oxidoreductase, N-terminal IPR001073; Complement C1q protein IPR007867; Glucose-methanol-choline oxidoreductase, C-terminal IPR008983; Tumour necrosis factor-like	Glucose dehydrogenase [acceptor]
	OYG_10007151	IPR000315; Zinc finger, B-box	NA
	OYG_10007290	NA	Heat shock 70 kDa protein 12B
	OYG_10007431	IPR009053; Prefoldin	NA
	OYG_10007604	IPR002181; Fibrinogen, alpha/beta/gamma chain, C-terminal globular	Fibrinogen-like protein 1
	OYG_10007608	IPR002126; Cadherin IPR015919; Cadherin-like	Protocadherin-like wing polarity protein stan
	OYG_10007645	IPR002181; Fibrinogen, alpha/beta/gamma chain, C-terminal globular	Tenascin-R
	OYG_10008005	IPR001611; Leucine-rich repeat IPR003591; Leucine-rich repeat, typical subtype IPR007110; Immunoglobulin-like IPR013098; Immunoglobulin I-set	Leucine-rich repeat-containing protein 24
	OYG_10008041	IPR014044; CAP domain	Reticulocyte-binding protein 2 homolog a
	OYG_10008155	IPR003100; Argonaute/Dicer protein, PAZ IPR003165; Stem cell self-renewal protein Piwi IPR012337; Ribonuclease H-like IPR014811; Domain of unknown function DUF1785	Protein argonaute-2
	OYG_10008197	IPR001190; Speract/scavenger receptor IPR017448; Speract/scavenger receptor-related	Lysyl oxidase homolog 3
	OYG_10010192	IPR012816; Conserved hypothetical protein CHP02464	Uncharacterized protein R617
	OYG_10011284	NA	Sperm-associated antigen 8
	OYG_10012047	IPR001073; Complement C1q protein IPR008983; Tumour necrosis factor-like	NA
	OYG_10013151	IPR001991; Sodium:dicarboxylate symporter	Excitatory amino acid transporter 3
	OYG_10015348	IPR001073; Complement C1q protein IPR008983; Tumour necrosis factor-like	Complement C1q tumor necrosis factor-related protein 3
	OYG_10016086	IPR002872; Proline dehydrogenase	Probable proline dehydrogenase 2
	OYG_10016743	IPR000402; ATPase, P-type cation exchange, beta subunit	NA
	OYG_10018027	IPR002181; Fibrinogen, alpha/beta/gamma chain, C-terminal globular	Tenascin-R
	OYG_10019702	IPR002181; Fibrinogen, alpha/beta/gamma chain, C-terminal globular	Ficolin-1
	OYG_10020177	IPR001611; Leucine-rich repeat IPR003591; Leucine-rich repeat, typical subtype	Protein popC
	OYG_10021052	IPR001073; Complement C1q protein IPR008983; Tumour necrosis factor-like	Complement C1q-like protein 4
	OYG_10022405	IPR001073; Complement C1q protein IPR008983; Tumour necrosis factor-like	Collagen alpha-2(VIII) chain
	OYG_10023546	IPR001304; C-type lectin IPR016187; C-type lectin fold	NA
	OYG_10024061	IPR000323; Copper type II, ascorbate-dependent monooxygenase, N-terminal IPR000945; Dopamine-beta-monooxygenase IPR005018; DOMON domain IPR008960; Carbohydrate-binding domain family 9-like IPR008977; PHM/PNGase F-fold domain	DBH-like monooxygenase protein 1 homolog
	OYG_10025119	IPR004302; Chitin-binding, domain 3	NA
	OYG_10026832	IPR000555; Mov34/MPN/PAD-1	Lys-63-specific deubiquitinase BRCC36
	OYG_10028419	NA	NA

## Sheet: Table S6
Table S6 Annotation of canonical immune gene sets in larval and adult MADEGs
MADEGs: mortality-associated differentially expressed genes
	Gene Id	Interprosan Annotation	Swissprot Annotation
Larvae	OYG_10001511	IPR001190; Speract/scavenger receptor IPR017448; Speract/scavenger receptor-related	Scavenger receptor cysteine-rich type 1 protein M130
	OYG_10001976	IPR006052; Tumour necrosis factor	NA
	OYG_10002102	IPR001073; Complement C1q protein IPR008983; Tumour necrosis factor-like	Collagen alpha-2(VIII) chain
	OYG_10002838	IPR001304; C-type lectin IPR016187; C-type lectin fold	NA
	OYG_10002963	IPR001304; C-type lectin IPR016187; C-type lectin fold	Macrophage asialoglycoprotein-binding protein 1
	OYG_10004092	IPR001424; Superoxide dismutase, copper/zinc binding	Extracellular superoxide dismutase [Cu-Zn]
	OYG_10004656	IPR000719; Protein kinase, catalytic domain IPR001965; Zinc finger, PHD-type IPR002290; Serine/threonine-protein kinase domain IPR006565; Bromodomain transcription factor IPR009072; Histone-fold IPR011009; Protein kinase-like domain IPR011011; Zinc finger, FYVE/PHD-type IPR017442; Serine/threonine-protein kinase-like domain IPR017956; AT hook, DNA-binding motif IPR019787; Zinc finger, PHD-finger …	Serine/threonine-protein kinase TBK1
	OYG_10004826	IPR000742; Epidermal growth factor-like, type 3 IPR001599; Alpha-2-macroglobulin IPR008930; Terpenoid cylases/protein prenyltransferase alpha-alpha toroid IPR009048; Alpha-macroglobulin, receptor-binding IPR011626; A-macroglobulin complement component	CD109 antigen
	OYG_10004837	IPR002110; Ankyrin repeat IPR020683; Ankyrin repeat-containing domain	Nuclear factor NF-kappa-B p105 subunit
	OYG_10004922	IPR010345; Interleukin-17, metazoa	NA
	OYG_10005135	IPR001073; Complement C1q protein IPR008983; Tumour necrosis factor-like	Complement C1q-like protein 4
	OYG_10005421	IPR000157; Toll-Interleukin receptor IPR000483; Cysteine-rich flanking region, C-terminal domain IPR001611; Leucine-rich repeat IPR003591; Leucine-rich repeat, typical subtype IPR004075; Interleukin-1 receptor, type I/Toll precursor IPR008197; Whey acidic protein, 4-disulphide core	Protein toll
	OYG_10006439	IPR000157; Toll-Interleukin receptor	Transmembrane protein 173
	OYG_10021170	IPR001346; Interferon regulatory factor	Interferon regulatory factor 2
	OYG_10023843	IPR001073; Complement C1q protein IPR008983; Tumour necrosis factor-like	Heavy metal-binding protein HIP
	OYG_10024487	IPR020864; Membrane attack complex component/perforin (MACPF) domain	NA
adult	OYG_10000643	IPR002181; Fibrinogen, alpha/beta/gamma chain, C-terminal globular	Ficolin-1
	OYG_10001400	IPR000719; Protein kinase, catalytic domain IPR001304; C-type lectin IPR002290; Serine/threonine-protein kinase domain IPR011009; Protein kinase-like domain IPR016187; C-type lectin fold IPR017442; Serine/threonine-protein kinase-like domain	Cell division protein kinase 6
	OYG_10001483	IPR001073; Complement C1q protein IPR008983; Tumour necrosis factor-like	Complement C1q-like protein 4
	OYG_10001514	IPR001073; Complement C1q protein IPR008983; Tumour necrosis factor-like IPR012816; Conserved hypothetical protein CHP02464	Complement C1q-like protein 3
	OYG_10001779	IPR001073; Complement C1q protein IPR008983; Tumour necrosis factor-like	Complement C1q tumor necrosis factor-related protein 2
	OYG_10002045	IPR002181; Fibrinogen, alpha/beta/gamma chain, C-terminal globular	Angiopoietin-1
	OYG_10002498	IPR001073; Complement C1q protein IPR008983; Tumour necrosis factor-like	Complement C1q-like protein 4
	OYG_10002660	IPR002181; Fibrinogen, alpha/beta/gamma chain, C-terminal globular	Tenascin-R
	OYG_10002665	IPR002181; Fibrinogen, alpha/beta/gamma chain, C-terminal globular	Tenascin-R
	OYG_10002721	IPR001073; Complement C1q protein IPR008983; Tumour necrosis factor-like	Hibernation-associated plasma protein HP-27
	OYG_10003000	IPR001073; Complement C1q protein IPR008983; Tumour necrosis factor-like	Complement C1q-like protein 2
	OYG_10003004	IPR001304; C-type lectin IPR016187; C-type lectin fold	NA
	OYG_10003083	IPR001650; Helicase, C-terminal IPR021673; C-terminal domain of RIG-I	Probable ATP-dependent RNA helicase DHX58
	OYG_10003119	IPR001304; C-type lectin IPR016187; C-type lectin fold	Neurocan core protein
	OYG_10003256	IPR001304; C-type lectin IPR016187; C-type lectin fold	NA
	OYG_10003270	IPR001346; Interferon regulatory factor IPR008984; SMAD/FHA domain IPR019471; Interferon regulatory factor-3	Interferon regulatory factor 8
	OYG_10003573	IPR021757; Ribosomal protein L46	39S ribosomal protein L46, mitochondrial
	OYG_10003729	IPR001599; Alpha-2-macroglobulin IPR008930; Terpenoid cylases/protein prenyltransferase alpha-alpha toroid IPR009048; Alpha-macroglobulin, receptor-binding IPR011626; A-macroglobulin complement component IPR019565; Alpha-2-macroglobulin, thiol-ester bond-forming	CD109 antigen
	OYG_10003934	IPR001073; Complement C1q protein IPR008983; Tumour necrosis factor-like	Collagen alpha-2(VIII) chain
	OYG_10003957	IPR001073; Complement C1q protein IPR008983; Tumour necrosis factor-like	Heavy metal-binding protein HIP
	OYG_10004092	IPR001424; Superoxide dismutase, copper/zinc binding	Extracellular superoxide dismutase [Cu-Zn]
	OYG_10004133	IPR001073; Complement C1q protein IPR008983; Tumour necrosis factor-like	Complement C1q-like protein 4
	OYG_10004145	IPR008597; Destabilase	Lysozyme
	OYG_10004654	IPR000719; Protein kinase, catalytic domain IPR002290; Serine/threonine-protein kinase domain IPR011009; Protein kinase-like domain IPR017442; Serine/threonine-protein kinase-like domain IPR020635; Tyrosine-protein kinase, catalytic domain	Serine/threonine-protein kinase TBK1
	OYG_10004826	IPR000742; Epidermal growth factor-like, type 3 IPR001599; Alpha-2-macroglobulin IPR008930; Terpenoid cylases/protein prenyltransferase alpha-alpha toroid IPR009048; Alpha-macroglobulin, receptor-binding IPR011626; A-macroglobulin complement component	CD109 antigen
	OYG_10004828	IPR001304; C-type lectin IPR016187; C-type lectin fold	Oncoprotein-induced transcript 3 protein
	OYG_10004837	IPR002110; Ankyrin repeat IPR020683; Ankyrin repeat-containing domain	Nuclear factor NF-kappa-B p105 subunit
	OYG_10004922	IPR010345; Interleukin-17, metazoa	NA
	OYG_10005029	IPR001073; Complement C1q protein IPR008983; Tumour necrosis factor-like	Caprin-2
	OYG_10005030	IPR001073; Complement C1q protein IPR008983; Tumour necrosis factor-like	NA
	OYG_10005031	IPR001073; Complement C1q protein IPR008983; Tumour necrosis factor-like	Caprin-2
	OYG_10005133	IPR001346; Interferon regulatory factor IPR007087; Zinc finger, C2H2-type IPR015880; Zinc finger, C2H2-like	Interferon regulatory factor 2
	OYG_10005170	IPR002181; Fibrinogen, alpha/beta/gamma chain, C-terminal globular	Angiopoietin-4
	OYG_10005220	IPR001073; Complement C1q protein IPR008983; Tumour necrosis factor-like	NA
	OYG_10005327	IPR001304; C-type lectin IPR016187; C-type lectin fold	Collectin-12
	OYG_10005421	IPR000157; Toll-Interleukin receptor IPR000483; Cysteine-rich flanking region, C-terminal domain IPR001611; Leucine-rich repeat IPR003591; Leucine-rich repeat, typical subtype IPR004075; Interleukin-1 receptor, type I/Toll precursor IPR008197; Whey acidic protein, 4-disulphide core	Protein toll
	OYG_10005428	IPR001073; Complement C1q protein IPR008983; Tumour necrosis factor-like	Complement C1q-like protein 4
	OYG_10005529	IPR000421; Coagulation factor 5/8 type, C-terminal IPR000859; CUB IPR001304; C-type lectin IPR006585; Fucolectin tachylectin-4 pentraxin-1 IPR008979; Galactose-binding domain-like IPR016187; C-type lectin fold	NA
	OYG_10005550	IPR001079; Galectin, carbohydrate recognition domain IPR008985; Concanavalin A-like lectin/glucanase IPR013286; Annexin, type VII	Galectin-4
	OYG_10005862	IPR000203; GPS domain IPR000832; GPCR, family 2, secretin-like IPR001304; C-type lectin IPR002172; LDLR class A repeat IPR016187; C-type lectin fold	Latrophilin-3
	OYG_10006725	IPR001073; Complement C1q protein IPR008983; Tumour necrosis factor-like	Complement C1q-like protein 4
	OYG_10007098	IPR000172; Glucose-methanol-choline oxidoreductase, N-terminal IPR001073; Complement C1q protein IPR007867; Glucose-methanol-choline oxidoreductase, C-terminal IPR008983; Tumour necrosis factor-like	Glucose dehydrogenase [acceptor]
	OYG_10013049	IPR001304; C-type lectin IPR016187; C-type lectin fold	Perlucin
	OYG_10014035	IPR001315; Caspase Recruitment	Interferon-induced helicase C domain-containing protein 1
	OYG_10014499	IPR002181; Fibrinogen, alpha/beta/gamma chain, C-terminal globular	Tenascin-R
	OYG_10014500	IPR002181; Fibrinogen, alpha/beta/gamma chain, C-terminal globular	Tenascin-R
	OYG_10016424	IPR001073; Complement C1q protein IPR008983; Tumour necrosis factor-like	Collagen alpha-2(VIII) chain
	OYG_10023202	IPR000742; Epidermal growth factor-like, type 3 IPR001073; Complement C1q protein IPR001846; von Willebrand factor, type D domain IPR001881; EGF-like calcium-binding IPR006210; Epidermal growth factor-like IPR008983; Tumour necrosis factor-like IPR009030; Growth factor, receptor IPR013091; EGF calcium-binding	Latent-transforming growth factor beta-binding protein 4
	OYG_10024455	IPR008597; Destabilase	Lysozyme

## Sheet: Table S7
Table S7: KEGG (Kyoto Encyclopedia of Genes and Genomes) enrichment analysis of MADEGs and DEGs in larvae and adults
DEG: differential expressed genes under OsHV-1 infection. MADEG: mortality-associated DEGs.
Larval MADEGs	Term Name	p value	Enrich Factor
	04360 Axon guidance	0.00281301	5.14458
	04621 NOD-like receptor signaling pathway	0.00406153	4.72116
	01002 Peptidases and inhibitors	0.0224786	2.14661
	05152 Tuberculosis	0.0253455	2.99541
	B 09158 Development and regeneration	0.028162	2.57807
Larval DEGs	Term Name	p value	Enrich Factor
	04064 NF-kappa B signaling pathway	4.719e-09	3.90383
	04622 RIG-I-like receptor signaling pathway	2.06226e-09	5.94482
	04621 NOD-like receptor signaling pathway	0.000335889	2.24783
	04151 PI3K-Akt signaling pathway	0.0103927	1.51556
	04917 Prolactin signaling pathway	0.00989473	3.23848
	04623 Cytosolic DNA-sensing pathway	3.9923e-09	6.1116
	04630 Jak-STAT signaling pathway	7.44055e-06	5.64281
	04330 Notch signaling pathway	0.022814	1.9222
	04625 C-type lectin receptor signaling pathway	0.0338766	1.87063
	04933 AGE-RAGE signaling pathway in diabetic complications	0.0444118	2.14566
	04012 ErbB signaling pathway	0.0463	2.29185
	05162 Measles	1.5926e-10	4.11357
	04054 Pattern recognition receptors	1.99452e-10	3.64453
	B 09151 Immune system	7.83868e-10	1.82016
	A09150 Organismal Systems	2.82606e-09	1.42053
	A09160 Human Diseases	2.99217e-08	1.37935
	B 09163 Immune disease	3.36633e-08	2.70988
	04090 CD molecules	3.55506e-08	2.41835
	B 09174 Infectious disease: parasitic	4.04455e-08	2.40792
	05161 Hepatitis B	3.31968e-07	3.25618
	05152 Tuberculosis	7.4543e-07	2.39856
	04974 Protein digestion and absorption	1.81891e-06	3.05376
	05322 Systemic lupus erythematosus	2.62591e-06	2.9898
	01002 Peptidases and inhibitors	6.55919e-06	1.72921
	04512 ECM-receptor interaction	3.7264e-05	2.18659
	B 09172 Infectious disease: viral	3.91959e-05	1.49882
	00536 Glycosaminoglycan binding proteins	6.95615e-05	2.05863
	05164 Influenza A	8.25568e-05	2.41971
	04217 Necroptosis	8.25877e-05	2.61351
	05020 Prion diseases	0.000151185	2.43643
	99992 Structural proteins	0.000153887	8.86727
	04145 Phagosome	0.000189554	2.02957
	04147 Exosome	0.000236231	1.49166
	05168 Herpes simplex virus 1 infection	0.000305254	2.0959
	05142 Chagas disease (American trypanosomiasis)	0.000447022	2.59643
	B 09171 Infectious disease: bacterial	0.000827408	1.49254
	99976 Replication and repair	0.000975033	6.20709
	05222 Small cell lung cancer	0.0010217	2.26858
	B 09141 Transport and catabolism	0.00105067	1.47844
	04215 Apoptosis - multiple species	0.0011442	2.96861
	03110 Chaperones and folding catalysts	0.00157454	1.87656
	05133 Pertussis	0.00224245	1.98249
	01524 Platinum drug resistance	0.00244116	2.36461
	04510 Focal adhesion	0.00259723	1.59786
	05160 Hepatitis C	0.00273919	2.42683
	05144 Malaria	0.00277622	2.8214
	B 09192 Unclassified: genetic information processing	0.00282942	4.96567
	04610 Complement and coagulation cascades	0.00285323	2.06903
	04210 Apoptosis	0.00289272	1.97836
	04659 Th17 cell differentiation	0.00290053	3.6208
	04140 Autophagy - animal	0.00292525	2.40872
	B 09154 Digestive system	0.00295778	1.52842
	B 09132 Signal transduction	0.00309663	1.27442
	04972 Pancreatic secretion	0.00425838	2.40274
	05145 Toxoplasmosis	0.00446922	1.94131
	04214 Apoptosis - fly	0.00453634	2.28914
	05166 Human T-cell leukemia virus 1 infection	0.00527707	1.95157
	05150 Staphylococcus aureus infection	0.00586929	2.08059
	05200 Pathways in cancer	0.00786917	1.45466
	00537 Glycosylphosphatidylinositol (GPI)-anchored proteins	0.00920244	2.94574
	04612 Antigen processing and presentation	0.00960469	2.68415
	04091 Lectins	0.0096713	1.69452
	B 09162 Cancer: specific types	0.010946	1.42617
	A09140 Cellular Processes	0.0113046	1.22089
	05165 Human papillomavirus infection	0.0121236	1.44561
	04930 Type II diabetes mellitus	0.0124313	3.54691
	04975 Fat digestion and absorption	0.0130058	2.5465
	04137 Mitophagy - animal	0.0133548	3.04021
	04361 Axon regeneration	0.0135293	1.77345
	B 09108 Metabolism of cofactors and vitamins	0.0141453	1.73433
	05202 Transcriptional misregulation in cancer	0.016773	1.94439
	B 09176 Drug resistance: antineoplastic	0.0183004	1.5635
	00350 Tyrosine metabolism	0.0184039	2.39309
	B 09183 Protein families: signaling and cellular processes	0.0186202	1.13254
	B 09161 Cancer: overview	0.018955	1.24215
	04658 Th1 and Th2 cell differentiation	0.0194581	2.03815
	04977 Vitamin digestion and absorption	0.0196509	2.36461
	00535 Proteoglycans	0.020693	2.1041
	B 09193 Unclassified: signaling and cellular processes	0.0237515	2.28307
	05169 Epstein-Barr virus infection	0.0253002	1.79174
	04131 Membrane trafficking	0.0259779	1.27481
	00240 Pyrimidine metabolism	0.0265218	2.61351
	04142 Lysosome	0.0304423	1.67618
	05221 Acute myeloid leukemia	0.030811	2.52492
	00561 Glycerolipid metabolism	0.0310417	2.31731
	05140 Leishmaniasis	0.0351506	2.25712
	00531 Glycosaminoglycan degradation	0.0366856	2.69873
	05203 Viral carcinogenesis	0.0379242	1.73532
	04918 Thyroid hormone synthesis	0.0438622	2.0268
	B 09149 Aging	0.0446039	1.5954
	B 09164 Neurodegenerative disease	0.0470962	1.34104
	A09130 Environmental Information Processing	0.0498856	1.14353
Adult MADEGs	Term Name	p value	Enrich Factor
	04612 Antigen processing and presentation	2.00681e-05	8.33685
	B 09106 Metabolism of other amino acids	0.000258762	4.28752
	B 09151 Immune system	0.000468868	1.88183
	05164 Influenza A	0.00148454	3.36098
	B 09133 Signaling molecules and interaction	0.00165457	1.97044
	04512 ECM-receptor interaction	0.00225136	2.75414
	01002 Peptidases and inhibitors	0.0028257	1.92389
	04510 Focal adhesion	0.0037126	2.1815
	B 09183 Protein families: signaling and cellular processes	0.00434657	1.32623
	03110 Chaperones and folding catalysts	0.00586542	2.56199
	A09150 Organismal Systems	0.00785794	1.33977
	04151 PI3K-Akt signaling pathway	0.0108287	2.05695
	05165 Human papillomavirus infection	0.0113351	1.92429
	04610 Complement and coagulation cascades	0.0116232	2.85614
	B 09172 Infectious disease: viral	0.012292	1.5614
	05206 MicroRNAs in cancer	0.0148549	2.22557
	05150 Staphylococcus aureus infection	0.0163385	2.95416
	04974 Protein digestion and absorption	0.01982	2.82778
	04145 Phagosome	0.0240926	2.16129
	05020 Prion diseases	0.0352122	2.471
	00536 Glycosaminoglycan binding proteins	0.0376387	1.99294
	B 09163 Immune disease	0.0394557	2.07982
	05162 Measles	0.0434474	2.60747
	B 09144 Cellular community - eukaryotes	0.0463721	1.57908
	04147 Exosome	0.0487187	1.46307
Adult DEGs	Term Name	p value	Enrich Factor
	04064 NF-kappa B signaling pathway	1.48065e-07	2.78994
	04622 RIG-I-like receptor signaling pathway	9.32773e-05	3.02317
	04621 NOD-like receptor signaling pathway	0.000817546	1.82551
	04151 PI3K-Akt signaling pathway	0.000845844	1.51575
	04917 Prolactin signaling pathway	0.00402606	2.79972
	04623 Cytosolic DNA-sensing pathway	0.0141692	2.20149
	04630 Jak-STAT signaling pathway	0.0102904	2.60176
	04620 Toll-like receptor signaling pathway	0.00601048	1.90796
	04152 AMPK signaling pathway	0.0112231	1.82906
	04920 Adipocytokine signaling pathway	0.0141692	2.20149
	04066 HIF-1 signaling pathway	0.032227	1.59984
	04664 Fc epsilon RI signaling pathway	0.0432945	2.13123
	04115 p53 signaling pathway	0.0444141	1.83457
	04910 Insulin signaling pathway	0.0125434	1.64561
	A09150 Organismal Systems	5.21805e-15	1.41594
	B 09151 Immune system	4.39167e-09	1.56846
	05164 Influenza A	1.58556e-08	2.54664
	04212 Longevity regulating pathway - worm	1.16608e-06	2.75972
	01007 Amino acid related enzymes	1.52823e-06	3.19684
	B 09106 Metabolism of other amino acids	1.54753e-06	2.47519
	05162 Measles	1.8776e-06	2.54018
	B 09149 Aging	4.02987e-06	2.18381
	04510 Focal adhesion	5.48589e-06	1.70016
	05145 Toxoplasmosis	5.68044e-06	2.17884
	05161 Hepatitis B	9.92095e-06	2.34585
	A09100 Metabolism	1.50729e-05	1.30854
	04930 Type II diabetes mellitus	1.60626e-05	4.49733
	05169 Epstein-Barr virus infection	3.16506e-05	2.21284
	B 09105 Amino acid metabolism	5.9233e-05	1.73154
	B 09103 Lipid metabolism	6.68836e-05	1.66852
	04210 Apoptosis	6.69768e-05	1.99537
	05235 PD-L1 expression and PD-1 checkpoint pathway in cancer	8.78613e-05	2.71131
	B 09101 Carbohydrate metabolism	0.000115521	1.63618
	00240 Pyrimidine metabolism	0.00011912	3.26361
	04054 Pattern recognition receptors	0.000119228	2.03486
	00537 Glycosylphosphatidylinositol (GPI)-anchored proteins	0.000172878	3.15298
	00970 Aminoacyl-tRNA biosynthesis	0.000178809	2.86194
	A09160 Human Diseases	0.000197311	1.18296
	05225 Hepatocellular carcinoma	0.000214225	1.9967
	05132 Salmonella infection	0.00023694	2.14217
	B 09132 Signal transduction	0.000241913	1.25915
	B 09174 Infectious disease: parasitic	0.000261003	1.63451
	00330 Arginine and proline metabolism	0.000494193	2.61762
	05418 Fluid shear stress and atherosclerosis	0.00051876	1.85389
	04612 Antigen processing and presentation	0.000529288	2.70724
	B 09161 Cancer: overview	0.000596139	1.28021
	A09130 Environmental Information Processing	0.000654212	1.20741
	01002 Peptidases and inhibitors	0.000736414	1.38337
	04217 Necroptosis	0.000742154	1.95817
	00983 Drug metabolism - other enzymes	0.000743599	2.36179
	B 09111 Xenobiotics biodegradation and metabolism	0.00079687	2.08485
	00480 Glutathione metabolism	0.000831609	2.49587
	00630 Glyoxylate and dicarboxylate metabolism	0.000891532	3.17993
	04213 Longevity regulating pathway - multiple species	0.000915868	2.5684
	B 09172 Infectious disease: viral	0.000947408	1.28637
	03110 Chaperones and folding catalysts	0.00101864	1.66392
	04610 Complement and coagulation cascades	0.00111854	1.85496
	B 09183 Protein families: signaling and cellular processes	0.00112804	1.14397
	05222 Small cell lung cancer	0.00127338	1.88859
	01524 Platinum drug resistance	0.00133852	2.04424
	B 09108 Metabolism of cofactors and vitamins	0.0013463	1.7361
	00380 Tryptophan metabolism	0.00151685	2.44312
	04512 ECM-receptor interaction	0.00157469	1.6261
	04147 Exosome	0.00170157	1.30088
	B 09154 Digestive system	0.00179192	1.40943
	05135 Yersinia infection	0.00180317	1.89742
	B 09152 Endocrine system	0.00183718	1.30516
	00785 Lipoic acid metabolism	0.0019379	5.1106
	B 09144 Cellular community - eukaryotes	0.00195181	1.36206
	03029 Mitochondrial biogenesis	0.00196903	1.61762
	00199 Cytochrome P450	0.00218681	2.0941
	B 09171 Infectious disease: bacterial	0.00229179	1.32446
	B 09162 Cancer: specific types	0.00258487	1.3824
	04721 Synaptic vesicle cycle	0.00269841	2.30271
	00650 Butanoate metabolism	0.00344751	2.86194
	05416 Viral myocarditis	0.00427872	2.1252
	00410 beta-Alanine metabolism	0.00495891	2.5553
	05160 Hepatitis C	0.00513948	1.93665
	04974 Protein digestion and absorption	0.00573013	1.76001
	05212 Pancreatic cancer	0.00587624	2.18854
	05205 Proteoglycans in cancer	0.00589857	1.46277
	B 09181 Protein families: metabolism	0.00611545	1.16814
	B 09104 Nucleotide metabolism	0.00621417	1.70353
	00500 Starch and sucrose metabolism	0.00640692	2.46719
	03016 Transfer RNA biogenesis	0.00701256	1.81135
	04211 Longevity regulating pathway	0.00715904	2.13823
	05200 Pathways in cancer	0.00773088	1.33379
	04145 Phagosome	0.00954754	1.48166
	05133 Pertussis	0.00977437	1.57787
	05142 Chagas disease (American trypanosomiasis)	0.0102954	1.77702
	04215 Apoptosis - multiple species	0.0113436	2.02202
	B 09143 Cell growth and death	0.0121354	1.30951
	B 09166 Cardiovascular disease	0.012759	1.4458
	00010 Glycolysis / Gluconeogenesis	0.0132927	2.12711
	05210 Colorectal cancer	0.0134998	2.04424
	00980 Metabolism of xenobiotics by cytochrome P450	0.0141692	2.20149
	00590 Arachidonic acid metabolism	0.0143548	1.90796
	00062 Fatty acid elongation	0.0149033	2.63599
	04611 Platelet activation	0.0150919	1.66024
	05170 Human immunodeficiency virus 1 infection	0.0154893	1.53514
	05412 Arrhythmogenic right ventricular cardiomyopathy (ARVC)	0.0167413	1.87229
	00760 Nicotinate and nicotinamide metabolism	0.0171001	2.5684
	05140 Leishmaniasis	0.0175917	2.04424
	00640 Propanoate metabolism	0.0190826	2.10436
	04214 Apoptosis - fly	0.019213	1.72528
	05221 Acute myeloid leukemia	0.0204699	2.18283
	05230 Central carbon metabolism in cancer	0.0209688	2.07387
	B 09167 Endocrine and metabolic disease	0.0215421	1.39519
	04973 Carbohydrate digestion and absorption	0.0216846	2.68306
	05150 Staphylococcus aureus infection	0.0251138	1.59885
	04913 Ovarian steroidogenesis	0.0251423	2.01545
	05020 Prion diseases	0.0259174	1.53796
	05231 Choline metabolism in cancer	0.0275216	1.75733
	05152 Tuberculosis	0.0279443	1.3824
	05410 Hypertrophic cardiomyopathy (HCM)	0.0295054	1.6712
	00100 Steroid biosynthesis	0.0317325	2.75186
	00270 Cysteine and methionine metabolism	0.0329809	2.0123
	00520 Amino sugar and nucleotide sugar metabolism	0.0356114	1.69776
	04614 Renin-angiotensin system	0.0367791	2.64994
	05218 Melanoma	0.0391087	2.17756
	02000 Transporters	0.0395431	1.28892
	00051 Fructose and mannose metabolism	0.04147	2.32049
	05414 Dilated cardiomyopathy (DCM)	0.041494	1.60108
	00730 Thiamine metabolism	0.0422907	2.5553
	05224 Breast cancer	0.042542	1.46277
	00280 Valine, leucine and isoleucine degradation	0.0426085	1.9222
	05131 Shigellosis	0.0446287	1.61387
	B 09157 Sensory system	0.0446412	1.37337
	00230 Purine metabolism	0.0446947	1.5189
	00536 Glycosaminoglycan binding proteins	0.0457217	1.3303
	04520 Adherens junction	0.0461726	1.579
	00140 Steroid hormone biosynthesis	0.0461972	1.89393
	05100 Bacterial invasion of epithelial cells	0.0486467	1.56818
	00982 Drug metabolism - cytochrome P450	0.0499815	1.86648

## Sheet: Table S8
Table S8: Annotation of mortality-associated innate immune genes in both larvae and adults.
Gene Id	Interprosan Annotation	Swissprot Annotation
OYG_10000736	IPR002181; Fibrinogen, alpha/beta/gamma chain, C-terminal globular	Fibrinogen C domain-containing protein 1
OYG_10001346	IPR000157; Toll-Interleukin receptor	Toll-like receptor 13
OYG_10001373	NA	Inhibitor of nuclear factor kappa-B kinase subunit alpha
OYG_10001511	IPR001190; Speract/scavenger receptor IPR017448; Speract/scavenger receptor-related	Scavenger receptor cysteine-rich type 1 protein M130
OYG_10001805	IPR001073; Complement C1q protein IPR008983; Tumour necrosis factor-like	NA
OYG_10001861	IPR001073; Complement C1q protein IPR008983; Tumour necrosis factor-like	NA
OYG_10002099	IPR002181; Fibrinogen, alpha/beta/gamma chain, C-terminal globular	Ficolin-2
OYG_10002369	IPR002181; Fibrinogen, alpha/beta/gamma chain, C-terminal globular	Angiopoietin-related protein 6
OYG_10002435	IPR000889; Glutathione peroxidase IPR012336; Thioredoxin-like fold	Glutathione peroxidase 7
OYG_10002465	IPR001611; Leucine-rich repeat IPR003591; Leucine-rich repeat, typical subtype	Leucine-rich repeat-containing protein 27
OYG_10002656	IPR000157; Toll-Interleukin receptor IPR000483; Cysteine-rich flanking region, C-terminal domain IPR001611; Leucine-rich repeat IPR004075; Interleukin-1 receptor, type I/Toll precursor	Protein toll
OYG_10002660	IPR002181; Fibrinogen, alpha/beta/gamma chain, C-terminal globular	Tenascin-R
OYG_10002664	IPR001611; Leucine-rich repeat IPR003591; Leucine-rich repeat, typical subtype	Peptidylprolyl isomerase-like 5
OYG_10002665	IPR002181; Fibrinogen, alpha/beta/gamma chain, C-terminal globular	Tenascin-R
OYG_10002674	IPR001073; Complement C1q protein IPR008983; Tumour necrosis factor-like	Complement C1q-like protein 3
OYG_10002721	IPR001073; Complement C1q protein IPR008983; Tumour necrosis factor-like	Hibernation-associated plasma protein HP-27
OYG_10002835	IPR001810; F-box domain, cyclin-like IPR006553; Leucine-rich repeat, cysteine-containing subtype IPR022364; F-box domain, Skp2-like	F-box/LRR-repeat protein 14
OYG_10002838	IPR001304; C-type lectin IPR016187; C-type lectin fold	NA
OYG_10002839	IPR001304; C-type lectin IPR002353; Type II antifreeze protein IPR016187; C-type lectin fold	Perlucin
OYG_10002845	IPR010418; ECSIT	Evolutionarily conserved signaling intermediate in Toll pathway, mitochondrial
OYG_10002906	IPR001073; Complement C1q protein IPR008983; Tumour necrosis factor-like	Caprin-2
OYG_10002907	IPR001073; Complement C1q protein IPR008983; Tumour necrosis factor-like	Caprin-2
OYG_10002963	IPR001304; C-type lectin IPR016187; C-type lectin fold	Macrophage asialoglycoprotein-binding protein 1
OYG_10002966	IPR001073; Complement C1q protein IPR008983; Tumour necrosis factor-like	NA
OYG_10003000	IPR001073; Complement C1q protein IPR008983; Tumour necrosis factor-like	Complement C1q-like protein 2
OYG_10003166	IPR001073; Complement C1q protein IPR008983; Tumour necrosis factor-like	Complement C1q-like protein 4
OYG_10003256	IPR001304; C-type lectin IPR016187; C-type lectin fold	NA
OYG_10003367	IPR000209; Peptidase S8/S53, subtilisin/kexin/sedolisin IPR001073; Complement C1q protein IPR002884; Proprotein convertase, P IPR008979; Galactose-binding domain-like IPR008983; Tumour necrosis factor-like	Neuroendocrine convertase 1
OYG_10003440	IPR001304; C-type lectin IPR016187; C-type lectin fold	NA
OYG_10003556	IPR001611; Leucine-rich repeat IPR003591; Leucine-rich repeat, typical subtype IPR003603; U2A'/phosphoprotein 32 family A, C-terminal	Protein phosphatase 1 regulatory subunit 7
OYG_10003656	IPR001304; C-type lectin IPR016187; C-type lectin fold	NA
OYG_10003957	IPR001073; Complement C1q protein IPR008983; Tumour necrosis factor-like	Heavy metal-binding protein HIP
OYG_10004043	IPR002181; Fibrinogen, alpha/beta/gamma chain, C-terminal globular	Microfibril-associated glycoprotein 4
OYG_10004069	IPR000157; Toll-Interleukin receptor IPR003609; Apple-like	Transmembrane protein 173
OYG_10004092	IPR001424; Superoxide dismutase, copper/zinc binding	Extracellular superoxide dismutase [Cu-Zn]
OYG_10004133	IPR001073; Complement C1q protein IPR008983; Tumour necrosis factor-like	Complement C1q-like protein 4
OYG_10004134	IPR001073; Complement C1q protein IPR008983; Tumour necrosis factor-like	Complement C1q-like protein 4
OYG_10004135	IPR001073; Complement C1q protein IPR008983; Tumour necrosis factor-like	Complement C1q-like protein 2
OYG_10004177	IPR001073; Complement C1q protein IPR008983; Tumour necrosis factor-like IPR013017; NHL repeat, subgroup	Caprin-2
OYG_10004381	IPR002181; Fibrinogen, alpha/beta/gamma chain, C-terminal globular	Ficolin-1
OYG_10004625	IPR001073; Complement C1q protein IPR008983; Tumour necrosis factor-like	Complement C1q-like protein 4
OYG_10004654	IPR000719; Protein kinase, catalytic domain IPR002290; Serine/threonine-protein kinase domain IPR011009; Protein kinase-like domain IPR017442; Serine/threonine-protein kinase-like domain IPR020635; Tyrosine-protein kinase, catalytic domain	Serine/threonine-protein kinase TBK1
OYG_10004656	IPR000719; Protein kinase, catalytic domain IPR001965; Zinc finger, PHD-type IPR002290; Serine/threonine-protein kinase domain IPR006565; Bromodomain transcription factor IPR009072; Histone-fold IPR011009; Protein kinase-like domain IPR011011; Zinc finger, FYVE/PHD-type IPR017442; Serine/threonine-protein kinase-like domain IPR017956; AT hook, DNA-binding motif IPR019787; Zinc finger, PHD-finger …	Serine/threonine-protein kinase TBK1
OYG_10004826	IPR000742; Epidermal growth factor-like, type 3 IPR001599; Alpha-2-macroglobulin IPR008930; Terpenoid cylases/protein prenyltransferase alpha-alpha toroid IPR009048; Alpha-macroglobulin, receptor-binding IPR011626; A-macroglobulin complement component	CD109 antigen
OYG_10004828	IPR001304; C-type lectin IPR016187; C-type lectin fold	Oncoprotein-induced transcript 3 protein
OYG_10004837	IPR002110; Ankyrin repeat IPR020683; Ankyrin repeat-containing domain	Nuclear factor NF-kappa-B p105 subunit
OYG_10004922	IPR010345; Interleukin-17, metazoa	NA
OYG_10005018	IPR000742; Epidermal growth factor-like, type 3 IPR001190; Speract/scavenger receptor IPR001507; Endoglin/CD105 antigen IPR006209; EGF IPR006210; Epidermal growth factor-like IPR017448; Speract/scavenger receptor-related	Deleted in malignant brain tumors 1 protein
OYG_10005100	IPR001304; C-type lectin IPR016187; C-type lectin fold	Aggrecan core protein
OYG_10005133	IPR001346; Interferon regulatory factor IPR007087; Zinc finger, C2H2-type IPR015880; Zinc finger, C2H2-like	Interferon regulatory factor 2
OYG_10005135	IPR001073; Complement C1q protein IPR008983; Tumour necrosis factor-like	Complement C1q-like protein 4
OYG_10005141	IPR001304; C-type lectin IPR003990; Pancreatitis-associated protein IPR016187; C-type lectin fold	Collectin-12
OYG_10005170	IPR002181; Fibrinogen, alpha/beta/gamma chain, C-terminal globular	Angiopoietin-4
OYG_10005177	IPR001304; C-type lectin IPR016187; C-type lectin fold	NA
OYG_10005194	IPR000157; Toll-Interleukin receptor IPR001611; Leucine-rich repeat IPR003591; Leucine-rich repeat, typical subtype	Toll-like receptor 13
OYG_10005220	IPR001073; Complement C1q protein IPR008983; Tumour necrosis factor-like	NA
OYG_10005221	IPR001073; Complement C1q protein IPR008983; Tumour necrosis factor-like	NA
OYG_10005421	IPR000157; Toll-Interleukin receptor IPR000483; Cysteine-rich flanking region, C-terminal domain IPR001611; Leucine-rich repeat IPR003591; Leucine-rich repeat, typical subtype IPR004075; Interleukin-1 receptor, type I/Toll precursor IPR008197; Whey acidic protein, 4-disulphide core	Protein toll
OYG_10005427	IPR001073; Complement C1q protein IPR008983; Tumour necrosis factor-like	NA
OYG_10005428	IPR001073; Complement C1q protein IPR008983; Tumour necrosis factor-like	Complement C1q-like protein 4
OYG_10005429	IPR001073; Complement C1q protein IPR008983; Tumour necrosis factor-like	EMILIN-1
OYG_10005470	IPR000889; Glutathione peroxidase IPR012336; Thioredoxin-like fold	Glutathione peroxidase
OYG_10005529	IPR000421; Coagulation factor 5/8 type, C-terminal IPR000859; CUB IPR001304; C-type lectin IPR006585; Fucolectin tachylectin-4 pentraxin-1 IPR008979; Galactose-binding domain-like IPR016187; C-type lectin fold	NA
OYG_10005567	IPR001304; C-type lectin IPR003014; PAN-1 domain IPR003609; Apple-like IPR016187; C-type lectin fold	Aggrecan core protein
OYG_10005586	IPR003590; Leucine-rich repeat, ribonuclease inhibitor subtype IPR011029; DEATH-like	NACHT, LRR and PYD domains-containing protein 5
OYG_10005883	IPR000157; Toll-Interleukin receptor	Toll-like receptor 6
OYG_10006367	IPR001304; C-type lectin IPR016187; C-type lectin fold	Perlucin
OYG_10006368	IPR001304; C-type lectin IPR002353; Type II antifreeze protein IPR016187; C-type lectin fold	Collectin-12
OYG_10006371	IPR001190; Speract/scavenger receptor IPR017448; Speract/scavenger receptor-related	HHIP-like protein 1
OYG_10006380	IPR001073; Complement C1q protein IPR008983; Tumour necrosis factor-like	NA
OYG_10006414	IPR016187; C-type lectin fold	NA
OYG_10006439	IPR000157; Toll-Interleukin receptor	Transmembrane protein 173
OYG_10006693	IPR001190; Speract/scavenger receptor IPR017448; Speract/scavenger receptor-related	Neurotrypsin
OYG_10006725	IPR001073; Complement C1q protein IPR008983; Tumour necrosis factor-like	Complement C1q-like protein 4
OYG_10006889	IPR001368; TNFR/CD27/30/40/95 cysteine-rich region IPR002557; Chitin binding domain IPR009030; Growth factor, receptor	Myosin-10
OYG_10007098	IPR000172; Glucose-methanol-choline oxidoreductase, N-terminal IPR001073; Complement C1q protein IPR007867; Glucose-methanol-choline oxidoreductase, C-terminal IPR008983; Tumour necrosis factor-like	Glucose dehydrogenase [acceptor]
OYG_10007604	IPR002181; Fibrinogen, alpha/beta/gamma chain, C-terminal globular	Fibrinogen-like protein 1
OYG_10007645	IPR002181; Fibrinogen, alpha/beta/gamma chain, C-terminal globular	Tenascin-R
OYG_10008005	IPR001611; Leucine-rich repeat IPR003591; Leucine-rich repeat, typical subtype IPR007110; Immunoglobulin-like IPR013098; Immunoglobulin I-set	Leucine-rich repeat-containing protein 24
OYG_10008197	IPR001190; Speract/scavenger receptor IPR017448; Speract/scavenger receptor-related	Lysyl oxidase homolog 3
OYG_10012047	IPR001073; Complement C1q protein IPR008983; Tumour necrosis factor-like	NA
OYG_10015348	IPR001073; Complement C1q protein IPR008983; Tumour necrosis factor-like	Complement C1q tumor necrosis factor-related protein 3
OYG_10018027	IPR002181; Fibrinogen, alpha/beta/gamma chain, C-terminal globular	Tenascin-R
OYG_10019702	IPR002181; Fibrinogen, alpha/beta/gamma chain, C-terminal globular	Ficolin-1
OYG_10020177	IPR001611; Leucine-rich repeat IPR003591; Leucine-rich repeat, typical subtype	Protein popC
OYG_10021052	IPR001073; Complement C1q protein IPR008983; Tumour necrosis factor-like	Complement C1q-like protein 4
OYG_10022405	IPR001073; Complement C1q protein IPR008983; Tumour necrosis factor-like	Collagen alpha-2(VIII) chain
OYG_10023546	IPR001304; C-type lectin IPR016187; C-type lectin fold	NA

## Sheet: Table S9
Table S9: KEGG (Kyoto Encyclopedia of Genes and Genomes) enrichment analysis of mortality-associated immune genes in oyster larvae.
Term Name	p value	Enrich Factor
00535 Proteoglycans	0.000373	6.32409
00536 Glycosaminoglycan binding proteins	6.45e-07	4.68746
04014 Ras signaling pathway	0.0261998	2.64625
04054 Pattern recognition receptors	1.8e-11	9.12835
04090 CD molecules	1.5e-07	4.57653
04091 Lectins	0	12.179
04131 Membrane trafficking	3.2e-06	2.63547
04145 Phagosome	1.37e-06	4.74451
04151 PI3K-Akt signaling pathway	2.03e-06	3.79597
04217 Necroptosis	0.0185616	3.273
04510 Focal adhesion	0.00112731	2.66809
04512 ECM-receptor interaction	4.78e-06	4.59335
04610 Complement and coagulation cascades	0.00178101	4.03063
04620 Toll-like receptor signaling pathway	1.26e-07	9.21288
04621 NOD-like receptor signaling pathway	0.000758	4.09461
04622 RIG-I-like receptor signaling pathway	0.000261	8.75872
04623 Cytosolic DNA-sensing pathway	0.000172	9.56722
05020 Prion diseases	0.00758661	3.48712
05133 Pertussis	0.000266	4.25614
05135 Yersinia infection	0.0153629	3.43574
05142 Chagas disease (American trypanosomiasis)	3.81e-06	7.31611
05150 Staphylococcus aureus infection	0.000596	4.86378
05152 Tuberculosis	0.00369649	2.92262
05160 Hepatitis C	9.67e-05	6.54599
05161 Hepatitis B	0.000112	5.43711
05164 Influenza A	0.000118	4.74307
05165 Human papillomavirus infection	4.73e-07	3.62078
05167 Kaposi sarcoma-associated herpesvirus infection	3.29e-05	5.59682
05168 Herpes simplex virus 1 infection	0.000184	4.03811
05169 Epstein-Barr virus infection	2.59e-05	5.76992
05170 Human immunodeficiency virus 1 infection	0.0187372	2.85917
05206 MicroRNAs in cancer	7.9e-05	3.7689
05322 Systemic lupus erythematosus	0.00440618	3.90703
A09140 Cellular Processes	1.71e-07	2.21903
A09160 Human Diseases	3.47e-07	1.81833
B 09132 Signal transduction	0.0223604	1.482
B 09133 Signaling molecules and interaction	0.0120174	1.89594
B 09141 Transport and catabolism	0.000711	2.23356
B 09144 Cellular community - eukaryotes	0.00509915	2.08915
B 09151 Immune system	3.59e-05	2.30158
B 09164 Neurodegenerative disease	0.0149811	2.11128
B 09171 Infectious disease: bacterial	2.5e-05	2.6109
B 09172 Infectious disease: viral	6.44e-07	2.52991
B 09174 Infectious disease: parasitic	0.000344	3.21656
B 09183 Protein families: signaling and cellular processes	2.2e-10	1.93009

## Sheet: Table S10
Table S10: KEGG (Kyoto Encyclopedia of Genes and Genomes) enrichment analysis of mortality-associated immune genes in adult oysters.
Term Name	p value	Enrich Factor
00535 Proteoglycans	0.016858	3.35654
00536 Glycosaminoglycan binding proteins	5.55e-16	6.16996
04010 MAPK signaling pathway	2.25e-06	3.82569
04014 Ras signaling pathway	1.01e-07	4.77533
04015 Rap1 signaling pathway	2.16e-05	3.55753
04052 Cytokines and growth factors	5.55e-16	18.6387
04054 Pattern recognition receptors	6.66e-16	11.9912
04060 Cytokine-cytokine receptor interaction	6.25e-05	11.6492
04064 NF-kappa B signaling pathway	0.000921	3.98562
04066 HIF-1 signaling pathway	1.53e-08	6.8882
04090 CD molecules	3.33e-16	6.17254
04091 Lectins	3.33e-16	9.8724
04131 Membrane trafficking	4.45e-09	2.64693
04145 Phagosome	1.48e-14	6.0436
04151 PI3K-Akt signaling pathway	2.22e-16	5.83085
04510 Focal adhesion	2.53e-05	2.74505
04512 ECM-receptor interaction	3.41e-09	4.72585
04610 Complement and coagulation cascades	0.000417	3.66733
04620 Toll-like receptor signaling pathway	6e-15	11.1487
04621 NOD-like receptor signaling pathway	1.26e-05	4.2378
04622 RIG-I-like receptor signaling pathway	1.87e-08	11.1569
04623 Cytosolic DNA-sensing pathway	1.7e-05	8.53077
04657 IL-17 signaling pathway	0.00165806	5.82458
05020 Prion diseases	0.0189339	2.59112
05131 Shigellosis	0.0266852	2.97798
05133 Pertussis	2.9e-05	3.91554
05134 Legionellosis	0.0123125	3.63368
05135 Yersinia infection	0.0273053	2.62589
05140 Leishmaniasis	0.00286994	5.14378
05142 Chagas disease (American trypanosomiasis)	7.09e-13	9.31933
05144 Malaria	0.0050945	4.50081
05145 Toxoplasmosis	0.012033	2.60788
05146 Amoebiasis	0.0349235	2.76973
05150 Staphylococcus aureus infection	9.07e-05	4.42538
05152 Tuberculosis	1.35e-11	5.17065
05160 Hepatitis C	0.000281	4.76477
05161 Hepatitis B	5.43e-07	5.62724
05162 Measles	9.66e-06	5.15596
05163 Human cytomegalovirus infection	0.0200974	2.37346
05164 Influenza A	0.000203	3.69219
05165 Human papillomavirus infection	3.41e-08	3.22853
05167 Kaposi sarcoma-associated herpesvirus infection	4.64e-05	4.35679
05168 Herpes simplex virus 1 infection	3.55e-07	4.37222
05169 Epstein-Barr virus infection	1.61e-07	5.71649
05170 Human immunodeficiency virus 1 infection	0.000479	3.33853
05206 MicroRNAs in cancer	2.69e-08	4.20076
05235 PD-L1 expression and PD-1 checkpoint pathway in cancer	0.00127341	5.00301
05321 Inflammatory bowel disease (IBD)	2.01e-05	10.5619
05322 Systemic lupus erythematosus	0.00293423	3.31788
05323 Rheumatoid arthritis	0.00462079	4.60548
A09130 Environmental Information Processing	5.84e-06	1.72205
A09140 Cellular Processes	2.21e-09	2.10273
A09160 Human Diseases	1.23e-13	1.95825
A09180 Brite Hierarchies	0.00053	1.11704
B 09132 Signal transduction	1.79e-08	2.0693
B 09133 Signaling molecules and interaction	1.46e-05	2.33457
B 09141 Transport and catabolism	7.88e-06	2.32102
B 09144 Cellular community - eukaryotes	0.000845	2.04023
B 09151 Immune system	7.53e-09	2.48073
B 09161 Cancer: overview	0.00726369	1.53859
B 09163 Immune disease	6.09e-06	3.73873
B 09171 Infectious disease: bacterial	5.25e-13	3.32579
B 09172 Infectious disease: viral	3.06e-10	2.54692
B 09174 Infectious disease: parasitic	1.61e-06	3.41441
B 09183 Protein families: signaling and cellular processes	2.22e-16	2.14193

[truncated: 1 more sheets: Table S11]
